# Supplementary material for: Inferring Weighted Directed Association Network from Multivariate Time Series with a Synthetic Method of Partial Symbolic Transfer Entropy Spectrum and Granger Causality
Source: PLoS One. 2016 Nov 10;11(11):e0166084. doi: 10.1371/journal.pone.0166084 (PMC5104482; doi:10.1371/journal.pone.0166084)
Supplement: S3 Dataset — (CSV) [file pone.0166084.s003.csv]

x1	x2	x3	x4	x5	x6
4.48604016739395	7.70619193343436	4.1510561929346	4.15710796804087	-2.3715464315363	21.249515701793
5.02244418507808	7.84642895404916	2.96062926945144	6.86997918566472	-3.9316889854649	16.01695959207
4.67068135236972	11.2694574090122	4.27808962609806	9.50891931350795	-0.758014854368027	13.2051317573653
5.96069173903765	11.1669898671318	2.98693715284672	9.90025155698472	0.27257454730725	22.5524837693092
5.82838185690242	13.9999939743131	3.70335476437045	7.55086920854856	-2.19052648954975	25.7895819777503
5.88698073299262	14.6502526820975	3.06320567050246	5.91079906097189	-3.80500897087514	28.0539533543859
4.59069332738333	14.831905843042	3.69962636745661	7.97242241017051	-5.15622705527573	22.0659587242204
4.05866349230949	11.7418150633518	3.35091880267168	8.04526654906157	-2.82014361341646	31.0942668862164
4.28551597036421	8.04268971859513	2.38241953806783	9.29866961658816	-2.50049274461864	20.9467583559054
4.79712826657651	9.05277051569859	4.57015309162373	7.86407546964181	-3.19843462576555	17.5056811700697
4.29666817002826	9.66062996805313	3.39183607593906	8.43218752336001	-4.28131486974224	15.8704841302491
4.03491755660606	11.0315031182052	2.86103249894765	7.61342437306806	-5.46547932875523	18.9971949992953
4.50886806529657	7.95342344418338	6.01189453503349	7.47335290388308	-2.82646816493317	19.9946890488111
6.82373635640148	7.87538293460921	3.35585807708035	8.14830528801289	-2.97132192937731	13.0612954656523
6.13873075155445	17.3482823594322	2.78222310862208	9.66522970537081	-3.93676547927201	16.9610701685062
5.364746341112	16.8000565786222	5.95606312106396	8.18259853192802	-3.21836822502331	29.2786237124836
5.95890205964144	14.8936052958652	4.10692332171534	10.3937043813754	-5.15673216296226	26.9930539540692
6.86278172742081	15.8363641299009	5.51268387012011	9.87078926765357	-5.77163654012484	43.0829817691967
8.9703880942557	17.9687180598759	3.37761079513342	10.3819476675509	-5.7797103986887	31.3007550083726
6.69717459846216	27.6827727455695	5.20468716465311	13.2397787694599	-6.13047025821183	29.1645903125308
7.12338059231661	18.9120264162599	3.5651925843014	10.9050447356909	-4.57555221008087	73.5393680400187
6.43174578738842	19.0240159448409	3.09373546545173	12.9691950962216	-6.00677006601911	47.320811270795
6.17870052391154	16.6555968970861	3.22329927864287	10.0962783561058	-6.62402690920262	51.7900069439584
4.56107074891781	16.8720162356825	4.16976450056497	13.9649979971045	-6.80019800799069	35.2665174451189
5.76865500099187	11.2821197451865	3.98531283221383	14.2717938866815	-7.71320488971461	45.4984228297103
5.26973938837369	14.6290660225291	5.52437576488292	12.164803221917	-5.75235872804578	25.3736356300009
6.00473962792507	13.4864282191298	4.24189293284107	11.3223003201212	-7.60122663333326	24.3263260229524
5.30071247930689	16.4179134928827	3.96552455502212	10.9715379445744	-8.24574971744072	23.9249775180899
4.32596481636136	13.7403475567165	3.42067793437475	12.5981898624245	-6.86412931812511	33.2203091636585
5.68819756561734	8.48454230910101	3.64529777139814	13.7169193599469	-7.64192867009453	30.7636161110757
4.6635598611314	12.6747995748905	3.95523731111133	13.1511346507095	-7.76604851864684	25.7282380297706
4.66192767472997	12.7136541394962	4.25064479224854	13.5104718150031	-7.5522056968212	28.1018153066129
5.54280780986743	10.6524861574762	3.73799692111756	13.4171864700397	-7.41605047574484	26.1162458760367
6.66575490084256	12.5704125691593	5.01119018213251	13.7568884298316	-8.47820805605043	19.337717703849
3.83440044952147	16.7416957823936	4.5086465797287	13.2840274606816	-10.3765584558234	23.1567094913381
2.9759424875546	9.61626085018555	5.81740574483283	13.9092691594938	-10.0288190487045	31.8949869630129
4.375066097418	6.25302449546961	4.02824745351053	13.8972748930707	-7.90470145058143	23.0078835479631
2.57957113287403	8.92471045642441	3.90057857330578	14.917111643393	-7.93546786239887	14.5288354005288
1.60711694462082	2.90436575821298	2.76205184305599	12.9541831163867	-8.79946593298203	21.3017622974706
4.90333562637056	1.59949294020168	3.46443168220799	14.2273447961461	-7.53959781440297	12.8814769933482
4.83025688306205	10.0915213546575	4.43169722960346	14.9542989734667	-7.69100521918562	6.32113201474321
4.17522091591736	10.4324985185518	2.62299859437323	14.0873261422134	-7.49408124241404	17.7828700283597
5.39717586092642	7.93202209127731	5.20201094528023	12.121691817929	-8.17741019059017	20.8216830050218
5.78649001695141	11.9315597002881	3.93036282259832	13.8172982812666	-8.0303463729297	15.4522119030025
5.71667743922138	13.660172159825	2.62951884445819	14.8485739784963	-9.56684832896943	20.9869184826399
4.95561770490704	13.6908154489641	2.62412409707911	12.8146701576783	-6.67569802320265	30.0949423090673
3.69178855011734	12.9555057506404	5.42293624561224	17.498625166143	-7.15438584567775	21.6986640442262
3.63225135273153	9.90372494950056	4.25640273505522	14.5518690475898	-8.4461092556937	34.278129694758
2.80572961118427	7.70058237442471	3.15002506369837	13.2352504748638	-7.78309025984252	23.8199006020805
5.08161410841195	5.89745129147392	2.78394146631105	13.2732754994436	-9.06140889682292	14.7697579058057
5.63129175465513	11.1760646259905	5.115651231423	12.5810739280919	-8.83408225961842	10.9076367619391
4.19622501786577	13.2057669398755	1.98603006801402	14.468774914718	-7.51914144715529	27.0177213343306
4.19170644405076	9.25332052571673	3.46314145164194	13.8790703005163	-6.89016303461005	29.441428992531
5.70277907104628	10.0386795825911	3.77253794778452	11.9207417405767	-7.2409925106277	21.2762333302447
7.25476416303705	14.0566007814771	5.83407302798612	13.035327715815	-7.81502672187074	17.9708991379765
7.3898701880421	19.9614072087177	3.14974606213493	11.6031273726638	-7.69992509397813	33.487691977839
7.28841986833963	20.9558594056219	3.2356249686137	13.2673744884335	-7.86693323440876	23.2937194163939
5.75048329492578	21.5472873162708	6.21429547630189	13.4929396103992	-6.30833387542871	35.9990516794839
4.54212720296759	15.9146997972942	5.03281528137058	12.0619502061119	-6.84459096687494	39.9619930762086
4.41992851452781	11.9435187216494	5.16566837408452	13.7196375933571	-7.11540945185539	47.537111661579
3.62900259200121	9.35524292388119	2.63852068393629	10.7425648377754	-7.66609347744608	25.8667300771011
4.96076832323237	7.06458712408757	2.50046524103824	13.7357948011628	-6.38810018576454	17.5682408989485
6.0819482954071	11.3606655052657	2.85780163498767	15.0939158951873	-5.96254931903017	21.3059362839872
5.4680730794814	14.4598803368723	1.81461077702565	13.606671264337	-6.7301032979081	28.5257028747755
6.89290265529733	14.1039272242666	4.33445661048633	10.3534695682239	-7.42305731471111	35.7224837142176
7.14808930391114	21.1369675074314	2.93282930437156	11.0083355784095	-9.08816901272241	24.144458712939
6.26399253946168	20.2920086828112	2.7619465770302	11.2060883924299	-8.51127136822868	27.4767468146681
6.81067915887674	17.0280533589673	4.65553281072287	12.495633178704	-6.15127161807895	29.708403710008
6.47831887855039	19.1605615001738	2.12806796224382	13.663466549613	-6.33899084367414	19.7232545392246
6.23886847004341	19.1138465691854	3.52152388737297	11.6013337220231	-5.39653443576026	37.6181850129424
8.2417979492317	18.7916736045489	4.15218812738493	11.4364554914612	-5.60780640816876	31.1694774302168
6.00712826972216	26.2036451106251	4.08276335921424	11.7217081972776	-7.04945523509012	28.4597453106327
4.87657811438331	18.6588834853044	3.02459111510215	9.40396287859954	-7.33818317249531	57.1902301422597
6.35958835550326	11.6730797445567	4.05129748109746	11.0034756809345	-8.81967279079857	26.5420019190371
6.64828366341442	16.8076172695898	3.37676564742411	11.7549413298769	-5.97857831833615	22.3190209187005
5.32546098073896	18.1518809577702	5.58055347075317	14.8820378902567	-5.20352342327789	34.8696080828104
5.65407866234061	15.0679068538816	3.26511234762892	9.70418305747046	-4.87323986313196	36.8864990949568
4.81184075081015	14.2154782161585	4.47750992013356	10.0967649737863	-5.79276352834953	26.8257641755724
3.45947141825672	11.1887160742456	3.70308496996718	8.54995649262689	-7.99088782154235	28.0244274951897
4.83152783338655	8.39258869814894	3.01055832855305	11.1784339429291	-5.56743662491164	21.591619139915
1.62058003169617	12.0712776035698	6.41918094976674	11.5704659970309	-6.04730245092691	24.8761340049693
4.87567552469053	3.67416569128328	1.8950588352442	11.5854982589278	-5.83714895390635	21.4513064797627
6.17207543969333	8.24902914914906	5.96190240208456	10.523944939657	-6.3866641730985	12.5566481185851
5.73925573042628	16.9892787380027	2.10665512099209	10.7216434703606	-7.68606995331816	15.1923534502214
5.72634456415074	14.9257300497134	2.48919488061129	12.4099693749746	-8.50363183263617	25.8358817769884
6.52507001352514	13.345805397463	1.96926649353672	12.9275719464477	-6.79910151917043	44.9649567435847
5.81375104571264	16.6354723004498	3.5366214963986	13.7120097629342	-5.07951793110709	21.4646763623776
5.47803056071786	16.7337290618691	3.74686123758811	12.4887207208225	-6.64041726782651	45.4826158205538
3.25628809834071	14.9625352633282	5.37063304531535	9.52108911184606	-10.9365367183066	23.7176172600098
4.31117183016698	8.92281494720696	5.35452105733341	8.07793640819459	-6.75953131270728	21.7406846773474
4.49633112743161	7.58224428267257	3.59975101531822	14.0667402546958	-8.07419217038237	14.0947694488275
5.01294054736571	8.78584704942325	1.4921767589909	14.2886411089724	-5.19839175942471	13.179234641988
7.17465498686918	12.949099933844	2.53804183807106	13.3855773034408	-5.43028058684223	17.4259786302357
5.5202125637377	21.9632616855489	1.4339475121217	12.7116945530569	-7.5632340628291	32.9322322165345
5.20988274295857	14.3207361522376	4.55618955280669	9.68122577236215	-10.1869992199068	54.6781518838212
4.66576886375105	11.9788494316964	5.50392937254583	10.3204202106655	-7.65232177318327	33.3133037403509
4.60368164916857	10.7246482251165	4.08807445373448	12.2462570647476	-8.15207233858214	17.03483328109
3.42688334424862	8.85700009596887	5.75677700768235	11.6933500964581	-5.67703935207828	16.3669836078431
3.51393018277954	7.55021389719949	5.40025931997899	12.9758556264781	-6.51518193236004	9.57152119767539
6.27976264348843	8.14671697037888	3.02939491367589	11.6889847213474	-7.99988316954215	15.7033942169587
4.69422502308065	14.4531408204693	4.00420662077418	13.6938767821196	-6.83748760408973	22.5416350488163
4.73068296228553	10.8021735634412	3.20039728642086	15.2386844318645	-5.75714964616474	30.1526517812462
6.03958297006653	11.3796774716512	3.89185119041013	14.9070551815511	-6.90640993860007	32.3713763285579
5.02928772071634	16.4958575107758	4.0008539496114	11.4884256122395	-8.16966353062168	31.7737595985856
2.16799503621813	13.1835600487395	3.22189848649487	11.6564729797541	-10.3112026155278	28.3321065336167
3.81374086152148	5.73948724878984	1.66898643641291	12.7742506111529	-9.06211657978106	28.3184536282593
4.33251205280791	6.69063841442376	4.45965811045025	13.4052856016001	-4.76526980010926	14.8866607663271
5.23286676182963	9.60185129687937	2.18055581650085	14.2095496183306	-6.35572440505476	16.082506466521
6.21834210298183	12.210693051047	3.06950625329239	11.2599440409214	-7.19320761995649	19.7977126964382
3.99422799806369	15.8847745866662	2.6740246076298	9.73633077658669	-6.57255819068029	20.6393541944654
5.66886292576251	7.9598880092136	3.92276947277947	11.3235702528003	-8.18382722014795	17.0894786333973
5.95168724060845	12.9426896139611	3.2518142879326	10.074963174739	-5.77516059193893	19.0160435594706
5.9207949342128	15.6073012933	5.2668930349149	11.8291189406532	-4.69599228823045	17.9128157009282
5.03049268628497	15.3899672604299	5.15946922983965	12.9635463199529	-5.34725764938922	24.6326225956446
5.54882187078748	11.9541218797221	4.18726687434605	11.0756995338108	-3.54732612377442	20.1597778654363
4.96560254317608	11.9598567283505	2.88427822827312	9.44605109008586	-5.39266671943597	23.4919907273187
5.70555934533642	12.9028126913651	4.12320804852017	8.9670149541595	-6.92607427087987	20.9084590870086
4.08015384309045	13.2148527181677	4.97513704301725	14.1085240070832	-5.9622027201461	32.9119267690597
4.67296377604967	7.77781543140074	4.22095479119539	12.5195587357187	-6.77971349922235	35.1061186891531
5.14919384560147	8.92262824669123	5.81484179868431	10.21590062209	-6.95850931379985	21.5780831290313
4.94119888969756	11.9411158608099	4.46108869699542	12.3813096257773	-10.1829119633938	15.7617947090833
4.57563204172456	11.6757971036961	3.49460520081183	11.6425627838786	-9.83335648807476	22.9376956155666
6.80817137052886	10.8250278304289	5.04801754017052	14.3988004910828	-5.86452001840602	27.7616862993444
5.75102256144446	17.5316331620802	4.11868126281471	15.1180865132201	-7.43994885043864	26.2320444736036
7.0874914668659	15.7141143214285	4.21281405814577	11.1153364474572	-5.82321339536795	46.3536852173935
5.8843522458707	19.4049099952989	5.10961510679704	10.5224565163031	-7.71094254561291	38.1884798060164
6.5602065071782	15.6778744154407	1.68558847513591	12.6178747077759	-7.58685632012288	35.5071333783744
6.1140843983931	19.8591507925688	3.05200925606304	13.1436625753825	-6.88592739059758	40.2208760373947
5.87647889501471	15.389587431169	2.80811181370161	13.8242550772634	-5.41297779157275	43.2737716633534
5.86732668764573	15.6277093440401	4.91676015372506	12.4598991614952	-5.85602282767132	37.1895118947449
4.56084773145715	14.7104832005675	4.56750616338566	10.9720062998342	-6.71382189513569	39.3934457624779
4.65204594906777	10.7510696143158	3.95721955466017	10.7519283265875	-6.85836782353436	20.8357248870658
5.82125097479488	8.49576542540078	4.12621278309767	11.5538827018659	-6.95079223905482	16.3985227571594
5.84527120515225	13.7506655795501	4.76336227143488	13.4777512901383	-6.58045959267011	15.4465960130595
6.75786520445588	14.6814921202007	4.85607224170964	13.8455824946746	-6.18050677072186	30.0900080838485
5.58639949150449	16.8478207775445	2.75132772908593	11.5221775216026	-6.28572233061376	33.3179469607517
6.56921954453033	14.6785876338705	2.94438913405781	11.0452626425543	-5.51212148348829	35.2615907320102
6.62460955534515	17.293532404725	3.42541663647064	11.5139444074965	-8.66682788938326	33.893925216972
6.50138595410508	17.938015550311	3.78638646727796	11.7075484129278	-7.8669350771043	40.8713309381197
5.31099214086723	18.3283151763174	4.46009942453265	14.3233326958686	-6.42829624315523	43.9237435271168
5.21089144878162	12.4607118326643	3.227274047419	13.4695539181618	-6.49316050772216	29.9639276909144
6.63697141266371	12.8164459063742	4.89957297503607	13.0542122096303	-7.68189687649376	21.8842798641093
7.31135468780689	15.6295904809709	4.65224814321761	12.1575857952467	-8.10007103994536	22.2046347172949
6.75381110264889	20.1292275487777	3.30923458682068	12.4250303359987	-8.90641778306424	29.5629390621763
6.17172627934907	18.8025748495455	3.90064803971869	10.8555801684634	-7.06045782762476	43.1550350060085
2.99303742716504	16.3646582789497	4.23991418196904	13.2494811818865	-8.10725454420365	32.2983765854765
3.49769219738683	8.54992039748472	4.72609053098129	14.2735443792401	-6.6417291379508	40.8879598424962
5.10131778230638	6.50846411886149	5.34835703374352	12.2187316702375	-6.02291798276715	25.5761760788649
5.56960371085526	10.5573818489496	3.70367361901507	12.4403754097633	-7.6554330880176	15.1304407453608
5.06142160374065	13.1338355787167	4.3625706904533	12.3538574775628	-7.15916496547472	19.219275450013
5.72509841260675	11.0040866703471	2.80791842888198	13.4683332917338	-7.41549698079462	28.5827923128329
4.69332480210441	13.5359481921107	4.76228858235557	11.8965614193541	-6.89065513099614	28.2300623906465
4.89434986158661	10.1026573271995	3.83820391880046	11.6848697810082	-7.3369676161447	36.2337585092035
5.04879531401089	10.2380722768666	4.6778699163078	12.2212569899877	-5.73129009636469	22.776113490309
6.80982246060673	10.6832838576412	5.27788831522304	11.7346846353676	-7.24791179291207	24.7515534625457
8.91000648329947	19.0115076069146	3.27170652569123	12.8726623888179	-6.86321180471483	19.8005349492101
6.49576771880796	28.4326646869328	2.49757989299006	11.7596153668142	-7.991929139793	41.3145013632658
5.88209013278168	19.6926848473643	4.26017695946375	11.8488224087227	-8.13099172919538	54.5103353802965
5.70564311332911	18.1191168957642	5.47656916224515	13.5124744798046	-6.8496380948722	48.6065914196431
6.67053324501342	14.3094481108481	3.34471623946453	11.6093906246378	-6.78166186291105	47.4219798790747
5.96680546321034	16.7876163658122	3.02350147516206	10.9215637983954	-7.20785978128383	28.8632948036886
6.19985993247403	16.5430047739693	3.95198128329527	12.2554268049318	-7.23278764184992	24.2013614373896
4.94681456219892	16.6389600588232	4.25444323425235	12.94286845143	-6.31037806492009	33.9745345160747
5.10160278786607	13.0947520417592	4.52597095178908	13.2460928083606	-6.17812651160363	44.9428755446353
5.63518502544484	11.997723876945	4.13300649688268	13.208424938193	-5.66387675837726	26.7907030039978
5.31916424097063	13.4825123613501	2.02288717028224	11.7775529192013	-7.27952015268866	22.0864195398387
4.02780766774797	13.5487417734315	2.5734107365251	12.2414763331689	-7.24935218830006	24.6546115721113
5.88418337626034	10.0501062914943	5.69194196384859	12.5514251585605	-7.3519052929512	29.0704705393382
6.1223212581287	12.7008133116503	5.70315060425715	12.8877506160612	-5.50494450605997	24.0030343386516
6.0350305750507	15.0055817899189	4.09892303790369	12.5139537760872	-7.02427559807649	27.4254274545789
5.01824711204425	14.7734982794639	2.86825694563518	8.81432899756106	-6.14696636221388	18.2430768262905
5.48221541191476	11.9881891951976	3.49020900460971	13.8873993710994	-6.50226939053942	20.2579702468632
4.03329769543947	12.4950709268344	4.71795124109895	13.5969811837274	-7.95841456756991	33.2601350888968
5.47240779147082	8.51405841604424	4.06441648952432	13.0377435577981	-6.28363829293883	35.5599856542733
5.00149842233596	12.704149773471	4.26045518335748	11.7600939713252	-4.94294174748424	21.5395481799829
5.86830313793692	12.717967496849	4.5064594971689	11.9696817702619	-4.81974282869158	21.1639690564644
6.22699188784022	15.4629022620769	3.36370200131836	8.71371056621443	-7.27948845969729	21.4344831307525
5.9331901751951	17.7288759974807	3.05801743154718	12.6542140495008	-7.99789174428645	35.517344492985
5.40616955851179	14.5159765692232	4.60089205751857	12.8899762802344	-7.82133942510688	34.5484859456622
3.93897901183057	11.8231854510614	4.93515870095155	12.7529770803613	-5.33152234694923	31.3390214231307
5.95674334906406	8.42867493742485	4.54663182521276	13.170493604405	-7.87160164333338	29.108197395081
6.37180762914063	14.3654858452648	3.74976271507138	9.12144949772254	-8.21609236026815	19.2280158616703
6.49043282421466	16.2566441902261	4.44213596384483	13.3374647197896	-8.4162321068711	23.8893241898935
6.21166035719937	18.0473561907068	3.85842592338293	16.3999601486189	-6.04984603648138	36.1159371108509
6.48488369132204	17.1065532640117	4.56764968572221	14.5772771564904	-4.94725072240618	43.7222203672819
7.1123573864172	17.821345457831	6.14025239904203	13.4810087505518	-4.90779954425869	42.1350793289548
6.25361051624282	23.0538092278243	2.3489973652396	10.6462149887539	-9.89112586986152	36.8325241167539
3.27457802500611	19.5358512489808	4.89966667597271	11.6951134942323	-9.68472202307819	49.7121001354531
3.7045080258781	10.6893463877698	3.53826519388224	14.9002919390732	-8.31277932292386	40.0941476568411
5.48433197830085	7.96844802954755	2.88624595175512	16.3325732761315	-5.03130833995793	30.7620763393261
5.72274465445602	13.1983816083534	2.35226078495816	14.0588274933054	-7.65377946816954	26.5766815257218
5.168116604721	13.4899976157873	1.97837657995837	11.4639254613701	-7.56307451057299	21.0403770314972
4.67638297517256	10.7722702703589	3.5600162344137	11.9688163582878	-9.8207824251552	32.0578816772042
4.16312948083904	10.0087655705645	2.21421154818183	12.7571480552921	-9.68793144240824	22.9740032332234
3.60697214767932	8.50358803976489	4.76115753833209	13.4138045430285	-7.44492685619898	18.9867891287835
5.75900207942284	7.18953811191221	4.63004933494105	15.9164752966311	-6.83142759619363	11.6395797837065
4.73649961515119	14.5328015518428	3.22165535742839	12.7691691093962	-7.22815409194577	8.26152428100544
5.36311679942488	12.2778122346775	4.78095715500829	12.4113741106409	-9.83113082534511	23.0585683807373
6.65092090926355	11.6036833385928	4.07386484284052	12.4047461447787	-9.93675172342151	16.0280639422612
4.35136340739093	15.6096818941029	4.58800689503443	13.3688315133712	-7.30303011478987	25.9441948320414
5.39481218944297	10.908061247043	5.46941687422352	14.3467315753103	-7.73264598304846	35.2633004173982
5.58707765903535	12.6442159453272	3.8251888078349	13.9922214522782	-6.7914824964765	22.1954867798738
7.4292866549409	12.2457470518395	3.98713738310996	12.9829056162278	-7.87105291576038	30.2922522861321
3.94011047644244	21.1135094994728	3.74694938565409	13.0631864748643	-8.96004215674123	27.6586531288687
4.71374982085843	12.1248363658572	3.3797625677356	15.6105844935633	-8.50178381500299	44.0871780948109
4.38906328842553	11.416600747106	3.45689476499636	15.3658185592382	-7.98104707879875	35.6409730808993
5.79365188915695	8.03291811834935	3.25711221085037	15.4407585764555	-6.17512732915346	25.2300805130908
6.50612023713491	14.7543779133932	5.50301379941088	13.7336699925505	-7.51716803789219	19.4375752738796
5.63327769988495	17.6377929047381	3.267557789698	11.9304844622978	-7.46937321634548	27.5002591820376
4.11496996230604	15.5899658894039	4.04228560079317	13.1280589779493	-10.5670438640376	29.8027704731201
4.68952307899332	10.8354892148229	3.96538233627512	13.129707514935	-9.8841682288267	28.4222262169755
4.19499415924848	7.85186408127549	2.27470153004881	16.5106388292239	-8.01618224730848	21.678352595727
5.9381539816189	8.54051984232832	1.53180266802596	15.2816710638622	-8.74737148095109	24.4110223886337
4.24650811280741	15.854837102638	5.18886433994708	12.8872173818594	-7.45629099911737	17.8332281394381
4.72651666167709	10.6767351707447	4.09428883799079	12.8346767184326	-9.32884123190842	30.2489981521433
5.33019508336138	9.46225401523972	5.49997189131265	11.4256152591369	-8.21756782739388	25.4073624362253
5.39068603271976	13.4439055841645	2.08174217508019	11.8156483018639	-8.9450230575135	14.0066723916165
4.59580479500856	14.1361087437821	3.26650133465135	12.7115279566078	-9.04189012929173	12.1899397489269
4.25059997167327	10.802593953931	5.18853983402601	16.0841401066974	-7.92992812192697	32.9224799235616
4.35231844102829	11.1072491686154	3.83161790364711	16.1197546767435	-6.37692058407616	25.0981869977855
4.58794650044015	11.1443958577933	3.40596607903774	11.7316023921339	-6.37768515101261	28.8177361636935
6.49293228627435	10.7938423882511	3.17729035356405	11.4062386308602	-9.45122297665143	18.7967375303396
7.51637377274227	15.1198719288689	3.81773006556755	13.3105770748885	-10.0080783457365	17.9632081787925
7.19444668076203	22.3469298371137	4.90889159063533	15.2752055114121	-7.38339185742767	35.2548369943531
7.17935070878718	21.230283192024	3.20054425084376	14.3174505725564	-7.16627000104482	40.8710465672368
4.99184386667492	21.5913347418781	3.65412227810921	14.9404876201211	-6.85739827497428	39.5511219660529
6.08985695335775	12.2169342984062	3.2033270842859	12.963935815466	-9.82805472334988	38.3750159591665
5.06173238622332	14.2081704765418	4.14511206608224	12.3976984061794	-9.65592535789595	27.0426727056978
3.49672127468402	12.692245106392	2.04102308481266	13.4071382367015	-9.9556948838033	35.7446286946838
4.63402124635753	7.54903136907696	2.64477870990057	14.354501193759	-8.40371666630654	25.0903342500847
4.05043156651362	10.0340089897382	2.70026667833311	13.575225477753	-6.88513221067817	17.3378888683047
5.53355531909751	9.43295585879492	3.45784860293169	14.185152132088	-8.6610678336788	16.6552232001931
5.78192460256996	14.5187567172238	4.04724281574464	12.2479786921977	-6.46875672649476	20.1360170169938
6.55468056414883	14.9294630999203	4.2477342211965	11.3052347573812	-5.7167188941139	15.2997059314847
5.73647343586958	18.9462279190255	1.65567857209502	10.3577053842433	-7.05722959706069	21.9277501579289
5.68318211543243	16.0863485425335	4.00105731678821	10.7799365789072	-7.62679303975058	25.8632925442119
6.26858606445129	12.0610953530736	3.54500273456743	14.270625957047	-7.15273982809144	28.6759176100015
4.48523572590303	16.6228321588315	6.26947704575919	14.2214216064793	-6.36421422597554	25.6077222760242
5.346667171458	12.1707327292905	4.58296559551564	12.4598446431117	-5.55178885515581	35.8933008390214
4.17868855150518	14.7005165883939	4.96851528894471	13.046611872124	-6.4433486667092	16.6953831278978
4.95616440163655	11.3257428595353	4.76679012766344	10.4945911249559	-6.08199259240568	29.2361580252293
7.09353907996893	11.6800756569446	3.38910515819783	13.739596900356	-7.51706167946487	23.8474847084974
5.85891545908911	17.5800925544774	3.42793362967037	12.4062148870486	-8.67380350615236	35.2298681084093
6.5213067535685	14.1847796775413	4.86967928897058	13.3040368386753	-5.92755907310171	40.1543050437761
7.20237835846055	16.675396696099	3.00326946960749	14.2868993716833	-8.42106163498636	35.3218066701314
6.33239961121566	20.6269134262303	3.90420134823483	11.6593021465162	-7.45966170096008	40.9680843966403
4.97494842414987	15.5180648730005	4.35464808681117	12.0245033484628	-6.07963587901409	36.6569112746338
5.56673061000787	11.4721698018557	4.00741553682323	12.9735776167484	-9.17656426832201	30.1383515457625
6.54700085362945	13.8322692992522	3.9504932339306	11.3913923596986	-5.6371585147503	30.0249761306432
4.92935252097387	17.8307322584423	5.68219554576999	14.2446581634463	-6.42408041155674	23.4903757018322
5.13617588507433	14.1471817798991	2.04295453507298	12.8955044496243	-8.33586198169332	33.8564883435058
3.5511550149657	12.0179405400609	6.7077813289832	13.1576490389404	-6.65620120476518	31.6277560441851
4.57049978202419	6.66339334210611	3.8994270213452	13.3204156579883	-9.39644987157294	28.2674373335421
5.78551710524383	9.59021472169539	2.90983320906198	12.0854853273922	-7.51983963517144	16.7237531216953
7.61756026402954	13.4044655414451	2.40703440762122	13.4182120337728	-7.39587603812077	26.7514825380532
7.58131115561954	22.2243710241788	3.64405501915049	13.7854359198565	-8.01880732374123	16.2971808940369
6.69800000902888	23.0721593412603	2.39701845993576	12.583356418698	-6.79525562927049	64.18209027695
6.31148063264772	19.4186545474564	4.46480887124429	13.8114382170456	-6.19498011179194	50.9862939244548
6.71404011441177	19.3961068322575	3.0622031223963	12.5694363111507	-7.25586721319565	34.2693021097698
5.96567221915126	19.3673040382231	5.43127680483715	12.1419361779463	-8.52816394617849	26.0496618492634
6.44673281060511	16.7820902680481	2.73982600669054	12.7430118727427	-9.13863863474968	33.8777017093646
5.96478667151003	17.2117858866965	5.31639584544956	14.0689846629754	-8.13905070236953	24.6096993683906
6.44922175480389	15.2865861900402	3.99966297652695	11.7089118411642	-9.2151466053111	37.2537611476431
6.53900789353988	17.6310104656941	3.54063149732326	13.7066331471001	-8.95138104210617	27.9201616483888
5.20176867374011	17.7753749283981	4.74993629774687	14.5322128149285	-8.40491023046081	45.0693468113072
5.97736309312855	14.5601971092848	3.16831439149345	14.7794094267884	-7.28507060733397	29.9788232430013
7.10787785765308	16.1486797462607	4.64429065093311	13.919864206644	-7.08778185916401	38.5239318150091
6.1431030821714	20.4763540175392	4.93445231317351	10.8271232670601	-7.72049754883745	35.4263587343919
4.72078783482703	14.1961710531816	4.29877963601634	12.2381024276032	-6.7932540035722	36.3540897182795
4.36209799213031	12.2523903623797	4.53305868281339	11.7750345115307	-7.68724492111745	35.3275407925543
4.83472059710677	8.49573859344618	4.25251330079034	12.1822933659269	-6.04650084375528	24.0917522382444
5.78556812974017	10.51744380518	4.16805197831086	12.9426965388566	-8.80380689127892	22.0148903097841
6.55432138659298	15.1897177482459	5.31622132281425	11.981899757905	-9.19577959658933	26.8822386468861
6.85856395997832	17.7382942796529	4.87721076143908	13.0369228927951	-8.42873997160768	32.9934037967329
7.56024329150001	18.113476936335	3.56862910448496	13.8746066108333	-7.04445846384858	40.0322425428284
7.16547836778553	21.6935728496339	4.21697983747635	13.6885578436027	-7.17351399467475	40.5155211872936
7.10703412281316	20.7737297927228	4.81187331836158	13.1086132156283	-6.3153269037373	45.4383819724871
5.36968401179538	21.5746932874557	4.0358185175485	13.3786040818463	-8.43916322963045	53.8032411655096
6.59116804802624	15.5833176537032	2.71315553109826	11.7187164853137	-8.14980963208537	53.1767482519135
8.00169854789702	18.3188892834079	4.77427416157392	11.8407399831901	-8.56950699529065	32.3325950410343
7.45551774758426	27.0808977953921	4.42365308909069	13.5398801833756	-7.46120359040687	38.6054991901643
7.26620215953432	22.1467038938851	4.70338301001106	13.4709916546421	-5.73481663065575	61.6882244465394
6.45965208103645	21.156004827421	4.04085441770701	14.1363755464588	-5.60959901099956	49.4770129521494
5.53420790114858	18.1718748613684	2.45607087751583	10.92737279057	-6.27763435197497	33.327491111383
5.86969028114202	13.7437334142038	3.66677537760734	11.748066223375	-8.4197598938928	42.6964105699724
6.3833695031608	13.4574132231237	2.22715154028456	12.9542040045766	-7.63436981210078	35.1949370215048
6.67071944779823	15.4869535646366	2.75530497046817	12.1178704487575	-5.33237295909727	34.5688139921778
5.90080065860708	18.2711551318813	2.83216589024429	12.5237618291806	-6.84822626754708	32.0816151660561
3.87292989256719	16.0779453924916	4.51093225369284	11.6187889599146	-6.12020353233095	26.5591977572103
6.22693985157894	9.65277362388481	4.81755014187621	11.0633389965752	-5.4071752371516	32.0675732364789
4.90615374695247	15.9613813272873	4.47823250281527	11.5161117605421	-8.09467634583898	16.3057226056124
6.20070873249237	12.2582569298536	2.7950705572162	9.59661057276847	-7.05771686297515	23.9362871417239
3.61716503334398	16.6813309255154	1.8007526367329	12.3915362538458	-6.45058917974767	19.8509236215137
5.68612337559422	8.41982700270404	4.84576609641347	13.2922567412059	-6.48159432116705	35.0563102060967
5.43456306109368	12.360802408579	4.86062121190812	11.6565571060758	-6.02300147672823	25.4055149008668
4.77692843908801	15.0123875241656	3.49108854820886	11.9493505677494	-9.40546077852025	28.2859314019991
4.791366241982	13.1332191082013	2.7802752306805	9.9873152543577	-7.79340570105658	22.9498612461082
5.55828072820579	10.6936192789964	4.17221761637777	13.9379823569803	-9.03787854013921	16.9063406987916
4.176576275988	14.6888216779894	3.69038443819718	15.8129136714817	-7.15521433108941	25.2028263419263
5.70201052082792	8.22624635105425	3.71264541997921	15.3056315880858	-4.85748107427116	35.0047618192551
4.5638799824391	11.3302794042	4.40056203815985	13.6456544288455	-7.3788423224804	20.1315371244313
5.12987588072556	12.0584515089288	3.07499801269781	11.5918243467309	-9.14191627155219	18.6587419045902
5.57450222655874	12.5803864682705	3.84406996065864	11.0267845393578	-10.6624952787102	24.6570240425885
5.1982254691512	13.5110198021234	2.79923313418695	13.3881317036087	-9.5239569271581	26.1045027388426
5.74959575987913	12.2029404521595	3.76436500104595	17.3305495948668	-6.96545600968824	26.4905197796907
5.54975116741578	12.8086592461184	5.05693039263039	15.106104691429	-7.38057170517237	28.5254058499476
5.92309356914078	13.6994979344787	2.26139422975062	13.362183295935	-7.76077895465673	21.1878622360307
6.25036074150009	16.1814959217336	3.25529306869844	11.4400181538922	-10.823094229789	27.0018805295318
4.95443114318909	16.2538477926798	3.83623485377124	13.3680050370485	-9.75019266776231	23.3792221672742
5.75549030363626	14.138082997501	4.81726795657507	14.6825493485832	-9.70222400604222	32.3246219454356
6.35817992566806	12.5570938196288	4.35339472599086	14.4186632311908	-6.83873683440979	36.3865800922608
5.84051182094156	16.6692511600614	4.67626872695451	14.7290349909979	-8.19944593909125	19.5729110901029
5.6834042357833	16.1044115765621	4.5932507928841	12.7606892479189	-8.13658274077423	28.5090749803569
3.9378272501778	16.0549086811989	6.15582818945581	15.0128354889921	-10.2994846281889	31.0198519628387
4.15260555457673	8.61950696470565	1.78728437432816	14.5276473841105	-9.10145385026374	38.341656152994
3.73608464119441	10.8631476065162	4.51778628718511	15.4884411171924	-7.70299502657447	25.6615912838903
3.37630826303307	7.20896152285526	2.79535604349287	17.9883262413812	-9.03986315057232	27.4584096474418
5.58162608588895	6.67184319851161	2.17747419205219	16.8185175426591	-10.234511276282	19.1506503206149
5.44063674387547	12.4374015157198	3.35924941020498	13.4951228037232	-9.60345489986638	23.4840695715574
4.55595143733602	12.3342351802128	3.45246896843734	16.5948714455336	-9.92877089293633	15.6421556694762
5.21764663953981	9.37633430781346	2.09397095097358	16.1644306058907	-9.49501524498189	26.7276562791925
5.49868388580253	11.7620116154284	4.54271082161352	15.0035495951558	-8.34148066164589	15.7493566154499
5.0132167987246	10.2553442467502	2.56534602865965	14.1652339444093	-10.678579342103	16.4674133156105
3.84708307867646	10.4778026655287	2.89796946344922	14.080407142154	-10.6155357070161	18.4376133188222
4.82224341929909	7.6337042206946	2.84275497460628	14.6307041300298	-8.42581156359257	20.0268470086561
5.5762265790836	10.3527307270465	2.84201534161426	17.4202379409457	-7.59481509071444	12.9629367597375
5.09170026836497	12.5399134288734	4.26848267899715	13.7513506786034	-7.76116100529888	21.4517299961575
6.02412118235138	12.4384478238834	3.24235725877737	12.2181710276018	-8.70647122461184	17.9794645665043
5.31630117034586	14.81037118712	4.99961288617601	10.8534533690946	-11.117650164678	20.7281833008355
7.08801606944274	14.7822675747968	3.44533771969783	13.381248057724	-10.4075868895895	24.5670688662668
6.46344592775253	19.4942554719687	3.17022822385205	17.059753211058	-8.78672381881109	23.5871174785264
5.39217120570143	19.2519942568981	4.29026448100777	15.8821328148689	-6.33027769587712	39.8562500077567
4.7612264105598	14.3586183021867	2.95861794300076	15.2427810756198	-8.43608886569474	35.4172364634969
3.58618244301432	12.1402365752834	1.85938498709949	13.7221032057532	-7.97834695329842	35.6405746916885
3.39547315081455	8.46871585993562	3.32201690833211	11.7862679973245	-9.91137687495912	25.4001623659279
3.60670486913978	8.15021657657437	3.82424927893023	11.5864957561332	-9.30597332909107	16.4556376481765
4.01038845845771	6.88479392700876	3.99598567928451	14.1853356088088	-9.85476669654377	18.1357725871161
5.07862791196194	7.27767612010613	4.4842571695375	12.9910183004509	-7.56192692654135	12.96342918013
4.70382059622	11.2531591954084	3.82961691196703	14.5972346436344	-6.50796089771828	7.58218186079897
4.05841621719353	10.1542735365221	5.91903602104705	13.7112532124796	-7.87882708563119	18.1304776970246
3.96193111868404	8.02223158974015	5.97581430379438	13.0033773853069	-8.40374774192286	19.9730224150972
3.24422231132457	9.03718954093311	3.13696574212977	13.4412789674827	-6.36956786024843	17.4248292935277
4.83977705406922	6.87658878984802	3.62524498419716	15.2268993770054	-6.77886108578032	21.7112004039322
4.82890601093518	10.8117707742853	3.34657537634241	14.5861008543619	-8.56780717227548	16.6081126740026
4.75779546310456	11.2051937863603	5.85566641190307	15.6441570400011	-8.35624890752602	29.8844667465206
5.33794339373686	12.3047739277647	4.25301676848811	12.7594731287199	-9.58035224896768	33.975583501609
6.55897902274964	11.5886841530419	5.25435102719424	12.6213049291352	-9.17864120461134	23.3089407183025
6.85537722339434	16.1566890983195	4.41882760770603	14.5197216694094	-8.4150588666372	22.9300273966153
4.75680728094899	18.9605945327988	5.26662013408521	17.2613279932213	-8.80777379549577	26.1973091789348
4.74211222566961	13.2146013469095	4.3137813100472	15.0777882003625	-9.10584872704964	51.0483449214891
4.24877993312078	10.7664461955456	4.47816707900158	14.3514309373901	-9.76917911789957	34.2545884259675
4.1669023400534	9.06413151227057	4.40409592420475	14.1823427983662	-10.2729464341293	31.6568673669396
6.73533547642207	8.44870035433057	2.84658134651961	13.4020197429259	-11.40753709267	24.2866210716297
7.36369454814408	16.2436770094211	2.33637051731393	13.9933941911218	-9.75180513694568	24.1262029610089
5.9701050852132	20.2751261661292	3.02391157867656	16.1816121467244	-7.70907588530752	35.7093730944161
5.81920881960559	15.749634736287	4.80489289721456	15.3115086780239	-9.01472729844827	45.0552423528097
6.85643906500041	14.9672285191058	3.66184470692702	11.8343389217175	-10.5717796472736	39.002561482107
3.87766706111778	18.068425414663	2.76170075339317	11.2284621316142	-8.78922419156197	26.8401385403411
5.23696523961134	11.5568488467237	3.35634755545103	15.1270810741597	-8.67983219078405	24.1515961217005
4.29833731561971	12.8545716496698	3.12767015298607	15.6270885472152	-9.36453186939286	20.2086357839536
3.83661985557633	9.04348493586502	3.74982569913167	13.943551178387	-8.166590833265	29.4187479259255
4.55895740650991	9.6196119776719	2.9416310154431	14.008870981652	-9.07158698956975	19.732085933475
4.47676135779914	10.1119472236932	2.64877643122619	14.4172949749601	-10.0929513388504	15.7035627001381
5.45152545523638	9.12444777462048	5.06536736533684	14.4153246478932	-8.34066717301892	17.8900413657603
4.8204159900019	12.2262893422295	4.70764499361386	15.1314539889596	-7.28711341960987	16.2087714454614
5.10820600052784	11.6098732028217	2.97890070387235	13.1265913528128	-6.87094406115246	22.7833100659148
4.46570169576473	12.451430571421	2.06997555842266	12.3218022055914	-6.08559071212082	17.643540228143
6.13508067614946	10.0643849225067	2.9515289769652	14.3453604463801	-7.08869491296848	16.7630349702621
8.02081829579292	16.0043455624834	2.98743626992006	14.2080306258955	-7.42048237771035	25.3446015815349
7.48377632212125	23.7952950964096	2.73444326664245	13.2817122139587	-6.81561389462589	37.4578759513908
7.15263722768771	23.0303082926434	4.11562323190867	11.3450233674777	-9.61213269172138	37.6331837727998
5.74263959025777	20.6959013417861	2.82430981633391	12.6424778212234	-9.45126439086231	27.9947956603261
6.28592197580301	15.8530020655333	6.02104299504934	11.8383196033394	-6.47921172345596	31.0351826029602
6.98249880755971	17.6450033179902	2.1464323359824	12.4322779425928	-7.14844827499105	26.4352845921078
6.5535695385171	21.6961342677878	6.07725956426302	12.3131712221637	-7.41811303646222	27.4082523583752
4.84264505780335	19.2011535077757	4.42722599717231	12.1335337856326	-7.47251358917316	42.5489171128451
6.14462936244651	12.5577788002629	3.40712392778149	13.6838606064223	-5.94075724444631	29.9703986841881
7.67497781843954	15.542557683867	4.97221204421477	12.1192354937859	-6.72173656597433	38.6843003567468
7.36930425353787	23.0619815534979	5.75619133183055	12.7924766003743	-5.19180502662511	21.3257340915496
6.69606336113819	21.1273749211953	4.03377047904543	12.8149726531249	-7.93401160108704	60.764515859882
3.86700111796742	20.4214021896425	4.63343663823271	11.7647083425969	-8.38927059619694	50.3489771646216
5.70652727574928	10.9850518093069	5.28134451997205	13.4274681138542	-8.54412339988725	39.5368978459688
5.32097480496387	13.3614192250971	3.86105429755997	14.7582557731646	-8.1490337482409	30.7695795587373
5.324453986494	14.3614240077713	2.57018313958238	14.1736923075839	-6.81925299310873	38.8135061707636
7.05819487300756	13.3377522382487	3.68545252031032	13.0752240423753	-6.74888151445279	32.1598499962626
6.47249917121116	16.5422876625555	4.58626044177829	12.7846915613674	-8.63841608251793	32.5326842756801
5.81688735885303	17.5086251704337	3.42722436088046	11.8561892184962	-8.95666305520315	43.573189859055
7.52358100271046	15.8961616503816	3.51707435020041	12.431088218303	-8.17998402264569	38.6502362230325
5.80756588524941	22.9180410474983	2.82354572530608	14.3237713410513	-9.00225904072674	27.1943597002388
5.95271204678852	15.9758128133379	2.9075064648242	15.601725961146	-7.38693107480077	41.4912340190326
6.06633476202471	16.4026738350498	4.79048996775717	14.3006348267952	-9.56042613843255	38.0614805064464
4.34938045030032	15.8469138903874	4.74830655942198	14.3215580188359	-10.0010424044229	32.6514597671091
5.58860165330287	10.8091717638177	4.35979606624868	14.5999927894301	-11.7232258421612	30.2363632034639
4.40949487005618	12.3208586093789	2.65810497128018	13.5830434870847	-9.16111556658097	18.432028339138
4.41464889711142	9.15518106056566	3.6292963814947	14.3444014679413	-9.36939526351469	20.4685468310413
4.5384401495736	8.86317840337012	4.32567013224178	15.3605415534907	-8.14848498586372	23.0422048238413
5.12013683303164	10.3450111430854	1.81347816302408	14.6285920887092	-9.03843358588879	22.0625741575588
6.00603931930435	13.3221805091791	3.52012681253994	13.503079247756	-10.423978802232	24.3153732892554
7.54277239738601	16.4067850478521	2.65830344729881	16.2063219152155	-8.37564754640866	19.8992090651071
7.33074669964567	20.4375623600579	3.17247608457677	18.0546870745151	-6.77099189055139	30.6531202365034
7.49719619324955	21.6119903058722	2.56853317330865	12.8438564107931	-6.88777993603337	41.8532950448121
6.86857125815934	23.4600941424288	3.22684948330004	12.0965863221053	-7.94444943853312	24.9708905676047
6.06939301182569	20.9939915065699	2.69207818074097	12.5108058119929	-10.1251672343242	37.4562092454119
6.55391766346415	17.4318716466132	3.78286845232742	12.1376640885112	-7.3805195574116	32.4301455649074
6.73412803516146	19.0461998230448	5.68992744964802	13.6397306436486	-7.69508712443933	30.7325635539204
5.14046485338218	17.987418781484	4.7991769868389	12.7868018807101	-7.96422083575017	25.3539073574807
3.12208380039617	12.7864426808389	3.17328724632581	11.5969832620956	-5.87180331557233	29.4383249587666
3.4101436323595	7.03446345413247	4.42052754068112	11.472274717119	-6.69900778167193	19.4424417130878
4.46459884598858	6.78378714107628	3.46428235576393	12.903697390616	-6.8731111073088	15.411413682531
4.69877060920131	8.78715712473855	3.17840547861058	12.0596510071205	-6.68093496371057	19.0052647273201
3.56900749681275	8.89837991418978	4.11223102055481	10.3695698825429	-5.69395456448674	22.5497303762398
3.73277527346427	6.97240497064316	2.90388204332434	11.5138474266119	-8.29157942342971	17.9000586609156
3.8505476466916	7.32361857882369	2.01120581764644	10.1702591127866	-7.98930466856053	18.0333263346874
5.44693836578914	8.90287556702657	2.99448701220859	12.0168200388853	-7.09281056154	15.1679706423645
4.5626641322729	13.6693309339153	2.21065313087936	13.6451263462099	-5.55057223648128	14.6477513179497
5.32311800060072	11.8813926244781	3.85872051350498	12.146028942797	-3.85455713690828	27.0392491069981
5.64702226770303	13.2291744308063	3.87010858850939	10.9754606618945	-4.75372469281918	18.4213432478673
5.79871298619774	13.3913627882879	1.26937988116392	10.7171783289827	-7.09401326849331	15.3624733689885
3.87312713326757	15.4028325812124	4.90379988126259	10.393838680769	-7.03200333944227	20.8113243799282
5.12067063442091	10.6267350087701	5.51876738511304	12.1466865371538	-5.97368667615534	19.333083391005
4.8525957399273	11.2045700434058	2.42632882012423	14.0219722422804	-5.17242765769686	21.0675670802821
3.28074532873623	10.8046228675773	4.38992766613377	10.9744255356623	-3.59697579333045	23.1952436377131
4.12604816989364	6.29901438739134	2.65957449526253	12.7036926526196	-6.04534526585685	11.6407991975217
6.02162513960329	7.71869479721867	2.33322921489394	10.4741645591945	-7.93079232255812	16.3861879973803
7.00559149899427	15.6592160951264	4.91944439173685	9.32639172642284	-8.26787981981377	19.8118950766703
6.31246547127674	18.7675640218197	2.9156175830747	11.9885264804482	-7.54674913605174	20.0030725096965
6.28990914437576	17.2077952539341	4.28646221137561	13.1320785536789	-6.4720421783612	39.3888284425485
5.57761392012076	18.2823524915039	5.2708347958859	12.9278014487214	-7.79883094041389	28.1394766646229
6.44810090158599	13.482747496769	4.50397473374327	11.988424823228	-6.11924127911161	24.010735627321
6.66681235370336	15.6348855802674	4.56338708010224	11.4420980024784	-7.77756643509771	33.4708986749914
5.81437382268856	17.5320988284794	2.94760466546683	11.5731445301813	-7.04216744173894	25.2293726822658
4.66381492246384	16.2663618164542	4.51437717910082	13.4175925988652	-7.01730971005973	37.1233199022174
5.04039426050189	10.9128601310111	3.56713580624809	13.3246335762095	-6.11819298566143	44.3872720131595
6.35417449986033	9.55198182953849	3.489974938311	14.2066045820026	-8.1419500205439	29.2406205208577
6.64762748552249	15.4919562667519	2.58389776786132	12.3340986664595	-8.05708427821942	24.2809706300359
5.81507117059669	16.7755453519834	2.28826776489086	12.7460038606511	-7.36967273897228	24.2761704314773
6.4804893454179	14.723102081741	2.8659295100453	14.8319297755277	-7.69960701886407	35.3586666037624
6.75078294504179	16.0755960830355	5.08443263534379	13.5914941457378	-8.08622632532308	28.7371794652748
5.98344970823742	16.8137038151641	4.13368254620176	13.5691373685213	-6.40524078722786	29.4388542442021
5.45362200783974	18.4246698722046	4.81948688158297	12.554764801606	-7.19815208677844	24.3479671660422
6.31523598601792	15.0930169237026	4.60217393853957	11.218157994072	-9.00630276866966	21.4205031767806
6.19743632558053	17.7972564058099	5.32002419448576	11.9793005554742	-9.77586794149472	22.9003047967152
5.96876427846906	16.6705897975609	3.70476158983387	14.4350851327656	-9.30168491985613	43.5842659198404
2.81637068706551	17.0555925499645	4.60113943884486	16.2407487518923	-7.45127536743719	38.9843764875674
3.42689761663865	7.58762649536637	2.60506911063497	13.742253423604	-5.59456552446726	41.9880145528623
3.855671342243	5.27493753368525	3.79786686982866	13.5942791698089	-8.70430839143556	21.990935476448
5.19179781758851	8.95574927024933	1.51405627188141	11.2929920197782	-9.98926784100126	16.5614522812802
6.15745164451956	13.6278290993146	3.42633733840631	14.0666749260432	-8.78424650695266	17.227996385753
7.85979828001143	14.7770563890923	3.94935936222744	13.2185119642521	-8.61281735356502	30.2300714225953
5.45052240278273	23.4689818855702	2.44972578863699	14.4700522707982	-6.72423252892045	23.1961861933928
5.53547031571724	15.9340357634921	3.96930041155219	12.7488439159075	-7.95343293566866	41.8369160177133
6.28302743536184	14.9339027167383	5.08443794355089	13.2259491824358	-8.61179101018338	19.5421041842435
5.46489562002643	18.7871694286198	3.80215040288354	14.3804542085235	-9.48448734331559	25.3549658803319
5.01379555000257	13.1198910187217	1.99720470608457	12.8414835165439	-6.6975808217704	36.3188532413494
4.86779807314671	12.7225930155155	3.57200393622561	12.600369414174	-8.48505997580428	20.8995616353119
6.51034143248553	10.8239947586191	3.54224886096558	13.3337996662981	-8.19824323877886	24.3057204885061
7.00246229251652	15.8628866746295	5.27974142092721	12.0283105482353	-8.43333488176174	28.2567812871951
5.33571081480282	18.2755101625856	3.88196678454516	13.8462810943571	-10.0281025924047	29.3363060087711
7.1220449373965	13.5498882954049	3.74144310330545	13.9041079472109	-9.97324676876753	20.6177395117307
6.41402736281168	17.5642963241242	3.8381226832372	13.7378321201725	-6.82475515452604	25.8076624203481
5.50892720158454	17.4563855520172	3.90140358963309	13.0604606345352	-7.63453695313498	31.8376258033135
4.92985121864455	14.844743050882	3.9300870961718	12.5052954279979	-7.57190755501633	44.0549090586936
7.52499007812394	11.1488769664241	3.67075859034986	13.9709091903535	-6.95100248700478	33.7729464063893
6.73713440145523	21.5881666403352	3.26112434933451	13.0104813288923	-6.98563349515876	24.8424607547776
5.46382586657806	19.9426479837396	3.53088492834176	13.4061906894191	-7.95680803210184	40.3397182766778
5.61312372338752	14.6322693142383	3.74165182071816	13.0713848367709	-7.04549661576972	40.8012404007346
4.76320031848124	14.7349090310561	3.93672376661578	13.1063676614188	-9.98681559237198	32.8696160405779
6.15662229120302	12.6340313806868	3.56471789597461	11.7830100009443	-9.25281156754837	30.7321920584343
6.19240894276443	14.3236945565477	2.67021348396681	13.6063579759144	-7.33565012310152	24.5564429089612
5.95978133651815	16.1904440482297	4.33288952660619	14.2008686571744	-6.95455841598096	24.6355740096374
6.277741493404	15.1387475806155	5.46772936183615	13.4168006814382	-5.97405372261892	31.706862313364
4.88128090305911	16.5581731240016	3.68240930628362	12.8019966511797	-9.91141304607649	31.538679188175
5.0620019951181	13.1240404747357	4.59381013131549	11.9043526789682	-9.41704129099234	30.8693898885178
6.98914450429911	12.7980815843818	5.4473224742662	14.4063571092074	-9.31325938209536	20.3658535191972
7.07702529399145	17.4455510248964	5.85553314836719	15.4348785360087	-7.50339404530243	27.5322752959646
5.55615526813856	20.0317442569272	2.7970975485906	14.7806738485513	-4.93550979575086	44.5796917992963
5.11364567044858	13.3990175248646	5.60368454937802	14.5985680756769	-6.66757742606601	39.7788139085032
5.37036308869272	11.150528205049	3.70256285386824	12.3123975257633	-7.30807585466793	32.7917006116637
6.83696531817016	13.6454092979002	5.16070136112952	12.2958987681505	-7.15525400157749	33.6859804455738
5.35888555916178	16.4670759058454	3.55892117513604	11.2611772776108	-8.76554349138758	39.5127194947559
3.73241676590645	12.9284540876993	4.0931238294139	14.2154522212141	-6.77286726604394	28.0995866432217
4.75060212766464	8.9371105010972	5.22085510267989	13.4826798421185	-6.32982098003466	34.5638754051962
5.10521774170507	8.94659237632347	4.48481150678143	14.6485377679396	-7.03503951501807	20.6178176118232
5.65852901112838	12.0889278561326	5.1653964775768	12.2552027587075	-8.15907785513449	23.023385211622
4.86978905446631	13.2244244190962	2.53069557888946	13.6632467225075	-7.76297864897974	23.1910917205173
4.91148819012029	11.0753635887358	3.12829357800984	14.2198953800826	-8.16196848140049	28.4496461648114
5.50748789415595	11.9411561715885	3.96399000395797	12.7369984316184	-7.3448875225918	29.2881445475299
6.2308401118902	12.0467030799013	2.68751820755214	13.4991488361207	-6.85056118525658	31.4543205808417
5.92189204809032	16.3267481843309	3.41595980584086	11.9955206994975	-8.50722484576422	32.7806692589887
4.98556180995625	16.6310343271198	4.06171818252082	11.752569614255	-7.89620086586945	25.6628171712522
4.03606675484274	13.7198676349793	4.19854260193069	11.7546898489178	-6.92547911033685	27.2037823838866
2.41171386048706	8.38505112937381	3.13304137787889	9.94255123496091	-7.25942954133236	26.8244893744675
2.98393942969616	6.25608426403558	4.48856147326325	10.1991131334534	-7.27724810430311	16.0965641810822
4.7533522715079	6.28883111138135	2.86110209937737	11.7828492223572	-6.2419241620905	13.0351193179373
4.8018252607702	10.4310164150465	2.77616449847821	12.7283291074302	-6.17344401876849	14.2629306574184
6.00887835699035	9.72662497964512	2.32322880155447	12.113642125042	-6.48338650590624	21.5733147799696
4.88690633300343	13.589967700112	1.02182051330754	12.684672186658	-5.62904032632444	18.5005765244999
3.4780676542754	11.1143108633179	2.53315460628576	10.8640649734461	-7.40349953049535	28.4086148563434
4.6051980070452	6.61618406165609	4.93273413874089	9.70261645906016	-7.86419443000961	18.8131459366784
4.61158361696535	9.60283542448527	3.73962707454685	12.8523403593371	-9.27106763488581	11.5799549054089
5.07736479779692	10.5002702246328	5.5025545414718	10.4643398870009	-6.42641197638042	11.2236356601673
6.88673943911935	11.0819547810366	4.62899088445276	12.2737853758683	-5.541518393054	6.79896539558853
6.16206491398114	17.7105681863294	2.2525047670895	10.6489310381746	-6.62590963168351	14.3607516095122
5.79611307111488	17.6892722913559	4.90799202126689	11.0941905106916	-6.58880339653348	38.5067815266167
6.49276352962626	13.5252863975207	3.22447084455199	13.4142004652074	-8.66184189329386	34.3660252659474
6.42128630188237	16.3927518369608	4.0812014574962	13.7379695534391	-7.72432938364412	38.3843829033204
6.58586255811696	17.9067676089099	4.34167778871906	12.6319941410908	-6.14844100006083	41.6611251403368
5.83231858636192	19.1113024529849	3.93413175054576	13.731425741052	-7.90172180566708	24.4843431906337
6.44130985959343	15.3144525006586	2.2980986550592	12.7572672527807	-6.51594555192325	43.1292230170915
5.50604626508935	15.7162941284561	4.89375965509381	12.4709372094908	-6.98152061741094	29.0832405079454
5.07994396476158	13.4804215401213	3.43416098833355	12.9738243763919	-8.70838318776955	34.2963505002647
6.83162838567789	12.9712284933075	4.90083203295216	11.262962149059	-6.76622355547013	31.8823366382942
6.52618427382437	16.6833964682945	3.99175504730638	12.7410645465592	-7.60776145619667	26.9984135055579
5.38125487329733	18.1674056588939	4.00780468096835	10.9922716038592	-8.90674732633193	21.0412230785062
6.70715847814234	14.4559661920484	6.95937288832244	12.0308516037716	-8.07595745118742	41.3905456295495
6.37129185775023	18.3259742369948	4.47269601654487	14.0411292268111	-8.54583229575063	29.6750166843459
7.6416089540381	17.713763956075	2.93582181313497	14.9763089608788	-6.61295605961264	42.2448580076814
6.97419010150406	22.4121070045304	4.91461310463944	13.6199381005783	-5.4853858343824	37.8926826958832
6.07153032369885	22.4467306790399	2.89729283304633	13.3631447889112	-5.67232357437341	45.6230198823351
5.78655032297107	14.930841179147	2.92941774494367	12.8943631704052	-9.0867473670897	70.9483378473822
4.92274042887064	15.0567794153006	2.91705582188529	12.4993840192389	-7.57327700159663	42.5413940294961
5.57381887662049	11.3040934709411	3.07996652680321	14.7251135916813	-9.1123748363452	27.0312836296616
4.82771586682914	15.0461625779211	2.8043675161483	13.5160766224223	-8.50177869190972	27.3124144980721
4.00985596752285	12.1491841838947	3.06837198164665	13.5348807197761	-8.30920303341123	24.0837094783889
5.19465881427726	9.67989567749442	2.98299278645403	13.8597403523328	-8.2593181247161	20.2884741949469
6.00287414779705	12.5350959833102	3.88568425639439	12.0571529473356	-8.14850887308298	16.4706416378326
6.12168157294627	14.3548516203703	4.89438842389416	12.3557829282299	-11.4076296585901	20.230131488823
6.4246554452194	15.9554118161132	4.81058605604464	11.9593954784037	-7.37434835388355	20.7014677328773
6.29416924725497	16.7668151488052	5.31050358276421	16.0507016693402	-6.48197300388963	24.2621576255225
4.73730753066818	16.6247040683756	4.72399674133261	13.0156583730313	-7.18796728365011	28.2695511220729
4.78557123534681	12.2327709324953	3.10658351665678	12.7752560749431	-5.79237341556048	31.9354818921648
6.24353252749361	11.2172836201569	3.2801028961195	12.4213913724089	-7.44255583670596	33.1728054831986
5.64978351226037	14.6659459052227	3.07851058752988	13.902053297908	-6.79337056225716	29.1978857911152
4.12236843419488	13.6188714159773	4.46034037293291	14.3178264423088	-6.6123383695292	38.7485115546089
4.16947619418882	9.68741996394383	3.60494395783971	12.7023830168669	-6.4420752511876	34.8489656411393
4.58050242814545	8.59705002540119	4.42261169741943	11.98707136142	-7.24147447976122	20.6478901988292
4.75985177238675	11.1677702115892	4.07115230904589	10.6069467587832	-8.96921107781171	15.2600235703995
4.69021833799036	12.099466963402	3.17741265092171	12.5390220795027	-8.34981764523099	19.3637806669699
4.3764039960147	9.90061823229498	3.64942851897486	12.8357830083872	-7.2775030404123	27.7147237396242
4.25773898258352	10.0383102723255	3.99538400210092	14.156259124434	-7.40200686726425	21.65611718805
4.50785128023453	10.2504737557461	3.71604072811191	13.5819897133539	-6.91011713915277	23.3744451940122
2.41490802625713	9.84312733039937	3.22462732680706	12.9769273707062	-8.34056555034605	23.6715977258418
2.44184993140477	4.06490661402568	2.9166709609397	11.1159120697611	-7.36609101295865	18.2553188567453
3.25934191244518	3.75277348839	3.77404636086159	13.3351273359467	-7.51758745284114	13.7299847117256
3.81708040514651	7.73502513934986	1.51068519601345	11.3278746513821	-8.60880883151101	9.08542581687761
4.43647803698583	6.96982857908117	2.31434537276687	12.7479139552052	-6.63162855211588	14.2758123079099
5.08569310043691	9.95719559020672	1.54416908044875	12.2467400520262	-8.14660320870245	13.6063237913781
4.50011768249267	11.5250255116332	2.86841153123545	12.2480239946661	-6.64877014240189	16.2949277809788
4.54134093221852	10.8575576249358	3.43696221812345	11.1139092800764	-7.35093138488946	23.3382709998376
4.75336378545078	10.4231386455042	2.22404235400128	10.5128511755594	-7.45579808336132	13.42530872111
6.11207088841205	10.7549650062769	2.59170743864569	10.9904752753671	-9.39513538456256	14.5066746298726
5.22343207654117	14.2693366178749	4.87094739181648	11.1673903474897	-6.49781946935268	9.89489818941612
5.41068557747661	11.5094969531516	3.34329981956131	14.3574452125075	-6.24113634909617	20.9772545898334
3.78330218404217	12.3138964456407	2.69514664966508	10.9499358431506	-4.97047589717129	19.2016989434587
4.03326621249437	7.70576953422352	5.38986833551909	11.0908668183082	-6.20682279404497	17.1760612361156
4.67813730509837	8.77105774866298	5.14102880307076	9.43994964143421	-7.88779000889005	11.6507822716019
6.06294965605859	9.93900884806924	1.90877811619258	10.1646692161719	-6.67881882257925	21.6059479174825
4.05422650895657	16.4196201030601	2.99019954747571	13.3355647076803	-5.60040604478516	19.0896216962377
2.53758833271328	9.63372181072105	5.88589627098618	14.3962372678901	-4.89569272522015	22.7301076971821
3.75605540564197	4.84511536079721	5.61658608265638	11.2167160269816	-5.1233262248235	28.4531842471057
5.1919550154079	6.73200542164346	3.63720337176443	10.3743616365181	-6.57515178535537	17.4281180834441
3.85985344325899	12.3806531270796	4.39426898244688	10.030294189269	-6.99760279712285	12.06009683518
6.41974502303343	6.91767253476509	4.03939010737845	13.1921194161492	-6.07811229152878	18.9552940749632
5.59665963001036	15.9066188535164	2.37423686593667	13.512082145838	-8.42628121774322	21.521298346098
6.06242269037024	14.420420617945	2.17777346371416	12.0734661083413	-4.78023744745881	43.7603783356404
5.21089581905023	15.4715453457248	3.21618424468499	12.9863023999555	-5.79244837607353	31.1481502312904
4.18258097828574	12.8846939691352	3.81886507158295	10.9509023947248	-8.11049473032538	33.2384910862762
5.16228650690958	9.8811667980311	1.63567787053176	11.060885296223	-8.54934565303694	29.577465697577
5.67594258064308	10.5258749862527	5.71075370768183	11.7998218929133	-7.92849742295304	15.767217652853
8.29283642246233	13.9187780722833	2.38280964911621	11.7856466293007	-5.39582774571853	14.2373926314487
7.29191230544371	24.0366963340183	2.16439302596091	10.5213425237413	-5.98693507000771	23.712597075474
7.89228098102855	22.8911702220108	4.06380906835352	11.4207369281339	-5.75992321152118	42.8034441834544
6.04924635609716	24.4401570216972	5.00017243977621	11.9814429023301	-8.04721699336763	24.6683681981953
4.2092229626898	17.9452887088623	3.51175372860173	10.6505872243115	-7.23273618755441	63.013854543445
4.62313111759885	11.9110652188247	2.94978093520534	11.0008661557947	-5.789252478742	32.0809871380185
3.69160419310654	11.3306318061832	3.33871173192187	12.3633448425636	-5.57228615419171	17.0387703190032
4.0051644858751	7.37867093043008	4.44008272211161	12.847094375003	-5.81756954805294	23.5889640149101
3.61272976715932	7.36699669648398	3.16387977067698	11.1721976318369	-7.99590171688589	21.3002443502071
4.07093090380548	7.41024590589739	4.69839544326372	10.2996209709726	-6.53750996601439	14.1505011577369
4.50153000987914	5.53186160420967	3.10589238583656	11.5903349943212	-7.98465192208226	11.5415317317826
5.14237368727366	9.55656196122563	2.48994063116459	12.2310741741106	-5.54264826622966	12.1499026021081
6.87003404322048	10.4821740730016	3.67003091997173	12.2348154855544	-5.46181944504123	19.7899508222119
4.59458587180078	17.8882805259643	5.08254563974035	12.524564026102	-4.64642993532697	18.9505595022541
4.36077817601456	10.4155701834932	5.154754933176	10.978268092954	-6.02549612766055	39.8381243355957
4.24087066027715	8.32165234162342	2.76366421479096	8.34724927395701	-7.55075524061155	20.9167275490362
5.3548924588313	8.3808510329416	2.95097006891293	9.68521103844032	-6.13100690677855	12.1205260857411
5.62177705385174	10.5124407255821	2.71357053009708	12.9314317534157	-5.80999483356765	17.0682612592302
4.24986029645317	13.5973403857456	2.40769015664739	13.5330074670617	-5.48273470755799	26.8279635267458
6.28136870063797	10.4137340100752	3.66728228863293	11.6846709662204	-5.64208965819872	34.121494846891
6.04680077990083	15.5388672396713	3.45553799433061	11.5660138184806	-7.15767594868912	19.9048254385103
6.86292503555822	15.7031669861387	6.43426700347158	10.7609455589159	-6.56995667518015	23.8609137959254
6.10675790107526	18.2964932484964	4.64168900468936	10.3062836643957	-6.66183830818224	23.6708605648248
5.35360594954765	17.7412987923839	3.94272788886035	10.132795126912	-5.94090516038672	24.3956312185814
5.65437414548849	14.6184715638388	5.30469900603226	11.372832406822	-4.15739507866526	33.4253461247873
5.33275946887865	13.5983105499736	2.49650954036797	13.4516897002537	-5.37667081866514	29.7108459799903
3.28647256357409	14.0682517057417	3.69212719700953	11.1530502435363	-5.944769283729	41.7013233091282
2.60004771574118	7.26147805529901	2.74133948240549	9.58558884846386	-7.36727868196799	37.0918917989698
5.64286507153064	3.85712836100741	4.23930290891208	11.9817077604264	-6.70933002376394	20.0322068751385
5.93296408828992	12.53154243858	2.47728531217046	13.4055453341875	-6.39182111168962	13.2901420919917
6.0568505305112	15.2675685694936	3.63641738306938	11.4858248224649	-5.85273566687864	16.1580927387095
6.3645318303085	17.6885846957666	4.74343715083337	11.5777140077772	-6.69243567872576	27.5161416786243
6.69505067613712	16.4117448677945	3.84401254634982	11.4073951174005	-5.50204409129113	25.7835173971793
6.86222041253446	18.1371486837144	5.78820122912208	12.5199241788769	-6.07262619504108	33.9826876956438
4.96019720119142	20.7214853078891	3.50330555572619	11.4685000494072	-6.35312747376764	25.3191665082147
7.23957801114211	12.3042573098769	4.19417682485831	12.0608739288637	-6.5140514539707	38.0033035896013
5.093085619495	19.0405555984443	3.94068091507766	12.4594792083861	-7.06663914860215	32.391764349038
5.4399315656987	15.1946594976628	5.50258509940916	12.5548541425495	-6.5506715063983	36.6694621899503
6.15422853463322	13.291547738315	4.85111780846521	12.3731664806235	-7.53179892249286	44.30401629861
4.88421366674544	15.8421350673257	5.09114874205441	11.4573096205179	-6.64169592703513	30.933489245024
6.97601095000363	12.6834113141162	4.16167780296396	11.5055150618265	-7.89001405663337	32.2875527997299
5.24015330584252	18.5429702741162	5.18738606226592	11.7998211389028	-7.52711238859823	28.1259161244678
4.94376122178945	12.4387826101235	3.32286991940557	14.1146320480214	-6.82354820335503	47.4751980765344
4.98554588693561	11.8834820970583	4.11319748762798	13.8096123644751	-7.55503882111494	34.7320778416292
4.75316430703778	12.7906641318946	3.61210553755923	14.2214018322693	-7.59461577668954	32.3623621549414
4.96855717462809	9.84668157507831	3.42396530727695	14.448274855506	-8.45120713256915	29.3444042812219
5.38545960096818	11.9957610869097	1.84483253139536	14.1680131604276	-5.5742444317254	27.9457460264223
6.53053432755029	12.7108524719356	3.79324326377065	15.3705181133119	-7.81817503900785	22.1755697425501
6.27025532705526	15.8547790442722	3.38038651460814	12.1863460048361	-8.21594739611047	24.21194903293
5.82559512778482	16.3834705550658	1.09907750905993	12.7853315266364	-6.11352873837681	28.6156578034808
6.60512855721919	14.4213411126429	3.83549931676821	12.777372988383	-10.048390601048	28.463031628279
5.58998979373369	16.2904475467852	3.20838883436594	12.0340674555793	-6.84146399367551	18.9822711758234
5.88254599911784	12.7673454183645	3.08463079553463	15.5247700598093	-8.63921829058174	28.6239732970238
4.3956997791479	15.1736235289446	3.66997614722043	11.1417301383075	-9.98522302351293	23.8822002190036
5.36380290226126	9.65101140284782	4.62342489384876	14.981746848205	-7.76856910582108	14.366165925254
2.81156461095449	12.5932667392774	3.66285249848738	13.680861400289	-9.88345269099674	19.3800703412691
4.35083067101883	6.00793836709835	2.29230009898922	13.2916908467795	-7.01422036973448	21.4010573893483
4.8486158963743	9.39225273169103	2.7255242666088	13.7866498179294	-8.5170929643093	14.7512542627212
5.93119016862165	8.70386698261653	2.28664413836745	13.3371569886725	-9.12829176902945	19.5619483510425
4.29796290918632	13.2046682050218	3.0290807793542	12.8167467688063	-7.70666793500689	21.2447195431177
4.44299763261652	10.3536452284058	4.16528679417017	13.1286407372031	-9.68387173063626	25.3103034138372
3.67187033384684	10.8193903466889	3.07455612040122	11.1058104004953	-9.93742160751801	16.2853034834111
4.49267876042881	7.11272329152885	4.75690610706079	13.3458471626376	-7.78678812746394	15.8279334111799
5.06534765838319	9.76534683776462	3.85550685048442	12.4511089185432	-6.44944188121789	9.62642304709557
4.40342386688786	9.92978623442614	3.82378147930099	12.2426839772252	-6.97445146337006	15.7976738355477
5.30443674296283	8.25247035196268	3.4085403970316	11.008214667203	-6.77548710196035	20.0211518579939
4.26615122239209	10.8326153575008	4.15419703037421	14.0817827519655	-6.42094538237891	14.1047301683607
4.55756610793371	9.67038898961486	2.77556874620454	13.4878747291775	-6.46592999142334	25.577141718107
4.24614040138753	9.00182934605716	3.40826228625715	12.6621701063019	-5.3204119726702	21.2565052486522
3.47701596641076	9.94606178668302	1.98815810177401	12.0717584937753	-8.79580799460039	20.4151743692281
3.15182213524828	7.50274092507914	1.91617188293211	10.3808554939742	-8.91970244748553	16.7019500532328
5.87629190125404	7.30114161506661	2.34696604699911	13.5022590811952	-8.74174023505796	19.1289948975965
4.44298430591781	13.3649909429212	3.19680427437201	13.722116677541	-5.99918184190504	13.62477775041
5.37926045205084	10.2058284359832	3.06759807266538	12.0241829450264	-4.77888838343384	23.4317660158987
5.17278405479013	13.3323058816304	4.50353397966497	10.7351501892818	-5.45201768034177	15.8885812932873
4.27925531178461	10.6425327355013	3.99085867777248	9.32406675082054	-8.22532058539926	15.7221012075414
4.1726155899049	10.349130532064	4.07626666499607	8.92705391943574	-6.76642254625545	16.2699372267084
4.26388572805872	8.61528682756412	4.96556284392216	12.6422690868353	-5.96144770674611	16.8631953696464
4.95103816110769	9.24499497643493	2.91059421280052	12.0495989462149	-5.14431049564905	13.5899552449736
6.07650408424449	12.0229368374952	3.27514199449816	10.563560295037	-2.73732542518897	20.1483618875433
3.41064074788298	15.2924954908278	4.60876673282279	10.2940541920622	-5.11143429850216	24.8202289783105
5.49242794414897	8.12953250560279	1.98312933009412	10.1404334734161	-8.64803671132247	31.5563676662884
6.66428833131337	12.8165706366559	2.345602562607	8.06951611609616	-7.37066183819854	25.4135532123207
6.04528173898749	17.8833420646691	2.7882052356927	12.4729992904397	-7.5101521858621	22.00735155871
4.59053029189377	16.7809324049624	3.84403116307005	13.4260657192522	-6.91724476904918	28.0214412038719
4.36332453877695	12.0161203110115	3.87022178500831	12.1223404395585	-4.45506135963418	36.9716938295482
4.81208158098823	10.2782451304304	5.36480051049712	9.41301267048274	-7.92116466305991	17.8212289654645
5.16085535816706	11.3259428420917	5.07087244111348	8.94460910737971	-8.69635449312699	16.3853418486996
4.85809403777361	13.919744741451	1.97645530996996	12.5602029971319	-7.15190096987815	15.5528250169934
6.06484702017683	11.7193023361629	2.64464609703959	14.1607538246514	-3.97883511876889	25.2952491801249
5.12085082203494	16.2907707073908	2.55420552617834	14.2467875582099	-4.65545354102082	24.5054089580296
6.21236014692126	13.3352438043843	3.90943874100955	11.0051903356576	-4.8530823394214	41.2978156516288
6.13401465427719	17.1175693302271	6.06819626064391	8.8116935840565	-8.41441261750762	35.3940906684532
4.44500525336735	15.2466645364114	3.7635324678196	8.35560784160022	-9.60062480095788	21.7589665561018
4.10697621901497	10.7171141018269	5.45246624794013	9.69413418391476	-6.07797685238116	21.2345232012515
4.35589531584857	10.102251007147	3.94111783145346	13.7525764818612	-4.61960090874998	15.9378449571155
4.08057707036094	7.77297471310388	3.72013434402162	13.0106373694074	-5.88373863183399	20.9170646106337
4.54837805097299	7.53131984989465	2.6847833282444	10.4591401493691	-5.04425546256536	22.198919501298
4.8958459550042	9.09643501311074	3.05971109510536	13.0892218856951	-8.39692677972172	17.178414568686
5.18144493471249	11.5240516398134	2.90178943968738	10.498125402475	-8.3929431788641	25.1165742165878
5.55926185045968	11.7636772057065	3.03368545734133	12.3246387070957	-7.37959109896106	24.6981849867885
5.01258355348108	13.1760755819539	3.15758272114508	12.9045652977926	-8.22142694585327	24.8206271929583
4.89195960850717	12.5955622008587	2.41882911764171	11.9337439191615	-7.5953206369168	19.6345765606317
5.07708573476547	12.5714841946795	4.65986500252225	12.7291940712005	-7.81166772357224	21.1385908011298
6.7195926654932	11.9271046554396	3.33443829300904	14.9105211244638	-9.06572497172955	20.8293350834062
4.09235230139638	16.9945658375489	5.32825593303042	13.120353945944	-9.38467378124623	20.0000578897963
3.0596039711578	8.87343759086985	3.92276423691487	12.9445320792214	-7.45040841368375	25.7799232201327
4.56143191430091	6.3139503722242	6.00755780715248	14.5779051601346	-7.55376385564465	15.6274391999286
2.67698068255842	8.9863343356505	2.49264130133027	12.6055066131474	-7.85319425734847	16.4352022497579
2.51563247276728	7.72690409572328	3.60335734035954	12.9512653869947	-8.01313428888608	16.3745871948796
3.39598567879639	4.85653713766715	1.29433401154841	12.5102992501579	-8.65529194105274	20.5379284667558
3.06759468666419	8.36173757699399	1.50563378212767	14.8027738728155	-8.0880466305258	11.905059973845
5.41309892251925	6.76765448468233	3.15437046227448	14.6143988381005	-7.44720166700123	23.6209237792133
5.5393214100297	12.0002270804624	2.74987097425659	12.0692985223736	-7.18937931192376	13.1373522578177
5.22757483027153	12.9355145025822	3.1625430177132	9.16145598600836	-7.63725618595337	22.1131312116747
6.00478555621248	12.7425206601395	4.85674782076381	8.2606873336281	-6.59133603147046	12.6042912828949
4.57473003762873	15.1202151621625	5.99957464612696	14.1905648808398	-7.37955653391659	10.0053588156019
1.96893967548378	11.2610035134318	3.29282296000961	12.3950452093659	-6.92431683932281	23.3183720393344
3.36047583678462	4.45146989977544	3.85390217394813	11.8588215476257	-4.91649885068986	19.2436958455788
5.65798512769859	7.03355804430032	3.14355532776251	11.9300225741547	-6.19941776792904	10.5076277425897
4.67942789652653	12.543394170937	2.61876736426541	14.0845590523665	-7.1785657418862	17.5963805185918
6.02179214620102	11.9431555331199	3.26177314958923	11.8777380306602	-8.75787799757103	34.8602858536134
6.04475037335376	14.5496374824561	2.92569143008348	11.6107816904651	-7.58958803398278	23.8469439109338
4.13675213524607	18.2245508436143	3.05073100198318	12.9099495875212	-8.79628748932957	27.4993545565639
4.25694911637514	12.1763724811951	5.41274868638093	10.5202385409394	-8.17602265713819	29.3782815073194
4.40984183765594	9.54333901288745	4.95582766290038	15.0297464906405	-7.39880710395012	22.1965669532138
5.4268140258331	9.55359659795928	4.05279888992837	14.9296376100326	-8.16776227188004	19.8619520363651
5.20768545625128	10.9074238612519	4.38434077771828	11.527654835108	-7.49687715149769	16.8133291212881
5.38931817846911	10.3463037597754	2.28053947033889	13.750219703721	-8.28336758642056	18.5295136108631
4.79816846185103	14.0533717863487	4.20471321312637	13.7332977591227	-9.53043839996333	27.7504690868963
4.40769833857242	10.9599321715302	3.5924384532163	14.6372284100782	-7.64740569967642	34.8989839298104
6.5923842980472	10.4384563798761	4.66920236338816	14.7674350095623	-8.33243009178151	26.047062065398
4.12326598232445	18.6157851797739	4.59979305835109	12.4161769502342	-8.14989225357974	24.3471399544228
4.84796280103973	12.2068457195492	4.98774581810799	13.1436903774561	-9.98417622237343	24.0350524752741
3.68651083077196	13.8715746170992	4.19091327205456	13.9404189015321	-9.61517090227948	26.6269765509822
6.21733534016722	7.85286558249447	5.9508182392358	16.0032809694317	-11.0971705214102	26.4233329136312
5.88387541073056	14.4189365734281	3.71788507526291	16.4957286908888	-9.04922815915618	21.2906350758739
5.44204179425232	15.6532600196162	4.30486875791982	16.7436031719852	-8.94730589261616	30.5934101665956
4.95853618596951	12.2987931113632	2.98613972694539	14.2143149092764	-9.99361116733664	38.6162324505311
3.49450110791165	12.2978494031716	4.74543491411817	17.920301681561	-9.59535116664074	29.1920025985159
3.81796693279396	6.47694582341747	3.59111648540809	16.1858091106249	-9.03125088574152	35.3314742149987
4.63195453173173	6.43200615005247	3.53838276212983	15.6727215847627	-9.47197651335531	17.7272220881059
6.44740946885474	10.7241555416809	2.87586871727881	13.9791260608933	-10.5385998381354	16.1960870748705
5.66999395102736	15.6750349564467	3.16185646137029	15.1488905669932	-10.5374711711479	17.5763349211322
4.25250604883653	14.8363337562694	4.80920716539044	15.9415705524569	-9.36207272239204	34.7713679210795
5.35060269636385	9.57929062889044	3.60617118520234	15.0076519073572	-9.75958714412632	29.7746136984495
6.1819036832138	12.2136674757282	4.65442189143206	15.7680333398268	-9.68651771630378	19.6052277155553
5.28080513278777	17.077482540688	4.11847077786539	15.9691010773684	-9.83625942431117	20.3889690623233
5.23635548735769	12.3437127031493	1.94802060270733	16.9179279589495	-9.19682551743293	27.9420416343898
5.18642003769878	13.7291396302148	4.83725130444171	17.2178344342024	-10.0238469779082	31.0269200379291
5.85498836344308	14.0692689840221	4.57767853483634	14.1573930328021	-9.89508974909637	26.2240767865048
6.69219804455614	14.080822525575	4.65709601508699	14.7837105388736	-11.0845410181858	31.3883827562507
4.45529870465103	20.7910206140801	3.19436213969685	15.2831158802019	-11.3712074757165	29.0471228794082
5.86058308819869	14.1563034641449	2.95878912230256	15.6958631398091	-7.87802878741722	23.5665323907821
3.58008281634838	16.9429035977554	3.08331835637452	17.2162189018792	-10.0742537978379	32.568652581009
4.61025008793298	7.98328380543365	3.5294441234651	14.6949614153286	-8.96217500640621	39.2722022272887
4.03436987602854	8.78356583489091	4.82644998448245	15.7944911008807	-8.40004314307036	25.0405318756705
4.99186369443252	8.1212185023601	3.90710572948873	14.6292906439836	-11.5505194477457	17.29036039211
4.84840968744655	9.08019966218599	3.35135054252439	12.6943908610621	-10.7853421382954	15.0463746987159
5.48857097701508	11.5156237850799	3.74286312251734	14.4410486370286	-10.1136249350512	15.1769978825271
7.09091325448545	12.9475339587655	3.49828959514419	14.160488774589	-9.05383275608512	20.317227312495
6.27437279881793	19.2401248897067	2.45835104269532	15.4733081490263	-6.18293623839775	30.8248016130069
5.22609086861707	17.5372027043972	4.02367927970997	13.64280350473	-6.25234270128878	37.2863001016963
6.27005804684559	13.2995776105417	3.47340198599198	12.0754809993345	-7.27763903310525	33.3373099786888
5.50807921772963	17.4927356403258	5.20937935398907	11.3837698704476	-8.49584638311515	27.2183793693796
5.91626669818725	13.3134242210757	3.39978246671746	10.7341853129627	-7.63496811887716	31.3559798028981
5.84930732034867	13.5730399691158	3.1695372242897	13.2799930309298	-6.762945794074	21.3893971831921
6.80109877128041	15.3347431784663	1.55684855127205	13.9684893148704	-8.59309051466414	27.9661133737535
6.44698400839169	19.3978969023396	2.10699838739613	13.3322229306887	-5.82768937072424	29.4406412521178
5.04286401604659	17.2206219279949	2.5982513596482	12.9879701966943	-6.87140893222614	47.7455029943003
5.29886094617378	13.2787678662255	4.60717889800064	10.9463923336786	-5.86995825972531	32.9722855851085
5.22710194079415	12.1770850031516	4.82661928503029	11.6973252267595	-6.21345437046402	25.8832826937179
4.29504142291609	10.5204470672966	5.5679999985503	11.618941314846	-8.83949384671999	14.719917913718
6.80246008464786	11.6315949472128	3.86261349077041	11.5889150955478	-5.93723103697265	12.8482188309933
6.63814485729747	19.7765532047758	1.93263310435177	12.6224141992428	-6.46048877155216	16.3192432320545
7.5796386134428	19.1803396817837	4.41103209260569	12.0801001912567	-5.96436380088942	41.4843177370164
6.66729086468618	23.970152441445	3.53689102003479	12.549330153761	-6.53437605645186	46.0845112532608
5.79025526355895	19.2778908118085	5.9683868355952	11.9751702077216	-6.28014655815842	63.9761166388053
5.31802606155711	16.4101955291847	5.29914784062936	10.7575150918841	-4.21845761661533	46.7439025953998
5.24751325228952	13.3225876817902	4.1838256082162	12.61426337017	-5.64702794755671	24.2687180528166
5.63710285870314	12.2921596277431	6.4669540349121	11.5727318630573	-6.77076595394911	28.889775130744
5.98073446044941	12.7536389231745	4.35215775601138	11.2045781908983	-6.38583204110492	23.7306286718345
7.62215274213214	15.5405755722556	3.64615607429942	13.7661923256517	-5.458128130222	35.2015094032233
6.64401701696881	23.57273826233	4.27587570579285	11.9618253765456	-4.30777303239396	40.7333100968485
5.01669277445065	19.9301972667144	3.53332564315712	11.0396325048604	-6.34332818069498	48.0005650297844
4.35512311795034	14.0585017679807	4.82524478743554	11.1484451814687	-6.95903945042149	62.6067052127226
3.53843483920399	11.4509076029488	5.27314090326963	9.02682345175092	-9.15478683647003	39.1562887462484
3.67234288940781	9.03164496247153	2.75005982669065	11.8636870788947	-9.12248771165517	25.0293032426258
5.62576633336315	8.1144405963256	3.02365909229823	15.8934664473874	-6.48115042596855	21.0764796728691
4.26075032585857	12.912262644428	4.15074719753196	13.3616934360558	-5.02751511057362	16.8836493476941
2.91398843527974	8.93290419936577	2.80579356958853	12.642539280844	-7.73666840174723	29.2506445191278
2.79400059049891	6.16962018316261	1.78043506638269	9.19924155295705	-9.75105785144631	27.5962957117477
4.26908496180691	6.29903003903809	3.34053888073467	10.2518378012792	-7.94696969260101	13.4684509263711
6.5456835796851	8.06391279901556	4.18051306358065	13.9450607028538	-6.35640684989685	13.5677511464581
6.38289988058005	14.7972763860956	2.81322092426116	11.8071523675438	-5.66330993903285	17.2368127628178
5.92341122895658	15.4928201632688	4.6355607170586	12.4196950370008	-5.5495323809801	19.234189693783
4.75591458611311	14.0691860064895	3.44697928036859	10.7282918232579	-6.42422894105453	15.5507247730302
3.93826711977241	12.1516122888799	4.84588538435454	10.5649648713256	-5.67873228486021	23.5493530338418
5.91187498059351	9.18549457408447	5.20926126751485	10.4681116173777	-8.73065500434484	25.0969973999162
5.86686792236058	13.6295763494906	3.1101741018626	10.2540400059014	-7.98737294645475	14.5955346059842
4.69255360294327	15.9441601014631	5.41497690158827	14.0090907766952	-7.49697212941724	31.5779519595354
5.52556442163803	13.0421748996451	5.13306062329492	14.0066589675535	-5.50536441993145	28.4060046458614
4.71296458208716	13.3260779682297	4.36485807251933	13.9648377831384	-4.74853652464389	32.2190369875649
6.0375791433426	10.4835765636388	3.42871177756887	12.7587789136155	-6.38281936021547	36.5677257335925
3.85709962831997	15.4467495219866	4.05223528446198	10.9196777697092	-8.74421690920428	23.5806159313018
4.57112064163706	7.12767002136577	4.45326384504435	13.352552719917	-8.42397740569515	38.643186385747
4.53992512055945	9.11525210488557	3.63078460738648	15.0832440250868	-7.53373915283448	24.5435372136072
4.97066416363614	10.229144825847	2.62141280221487	13.299894120994	-7.55274158806797	22.2700320142615
5.19780110708204	11.924975778946	4.33789651374391	14.1821804037735	-7.0905321689213	20.320047172802
5.65496146184095	13.3256961316116	3.62262059486073	12.4767508706178	-8.78545569582686	26.0536607570416
5.10832294624609	14.6789013213969	3.47433054041676	14.2998749264466	-8.19985293129597	32.883791000859
3.92190447952099	13.3811154557441	3.56040969664725	14.5469488692309	-8.34971023833628	29.2669229808202
4.07273057798789	9.67524362203646	4.35511784833304	12.5177764009911	-6.51441408911331	21.0205581574476
4.34602443146489	7.01140778427766	3.4616340712859	14.2190715424913	-6.36216514438127	21.1442545181036
4.55644313560625	8.684095338977	0.357913212217511	12.8328484557515	-7.48225555371896	15.4601572132727
5.67263171769054	9.07606750258137	3.21037248684241	10.8576617920055	-7.99984597681569	15.7387121965108
4.89487286631591	13.6860647871403	3.24607056016333	13.2940937455603	-6.673618871813	17.3684773834282
5.68650448384002	10.8136160589186	1.94607094617915	13.0680229207312	-7.68651277919034	27.6804153575252
5.65909749532553	13.2502431052056	3.87985243674199	11.3505253598494	-7.01060909297345	20.6592387809893
5.62097256940994	14.8674491337148	3.35412632049915	11.1838421351161	-7.71505210272303	7.32767464598733
3.63096261118989	14.8884256057445	3.22273904134258	12.3278435285	-8.66832194314409	22.2792188016374
3.72201478937558	7.75772188569767	4.68826224946382	9.78893741777951	-7.39145544503409	25.886209621395
4.31259796716722	6.93390581857546	5.87936554289445	13.1462181411345	-6.78652442265181	11.6111136250959
3.30619727568101	8.85890776721688	4.51007584327562	11.8278327814934	-7.6174922545254	13.7405800481133
4.0973409056973	6.46059121353937	2.12881363123317	11.8059342869919	-4.59059564542692	16.8304649216777
7.98228306541288	9.12764690630878	1.46680868756789	12.6830321883113	-5.14459136660025	13.1867518957275
6.36086705139897	20.7653108981946	4.04842328434704	10.6403497021052	-5.41795481150415	23.4268016442105
5.78749636747001	19.3179482018046	3.48070076839885	11.2252574693139	-6.31701014472108	54.4165336146349
5.81023013328091	14.4576579039203	3.78172277440702	9.52914404662039	-9.2463360613336	46.2157543964052
3.95945709209002	15.0985811866252	3.70583960708639	9.83834430952462	-5.45444566331691	23.6305428339556
5.35265145794879	8.68431029354954	4.01066391681516	15.0266135935866	-5.64549361447033	14.1641760261235
6.16953551780829	12.138577134761	6.26967663742836	10.8927983157995	-5.46127504168995	18.7141676994656
6.07421308320733	15.2335405077029	4.75268054925524	11.01127115394	-2.5815596406542	20.875882971534
5.04208673366392	16.4930601011963	2.40656168604699	13.148121442881	-6.5844718065862	27.6655050405928
4.52028427452902	13.1324530777543	3.09373614688681	9.34268230926117	-6.3539313158043	31.9209158343732
3.34804473170525	11.0146788227033	5.25910535909015	13.4669354071273	-4.85543387338777	30.3012643914312
5.74040983958543	6.6876641820046	0.801640369723237	11.8434244506534	-8.06799977480273	34.6701034746974
5.50280791265048	12.0789083679628	2.96553824923309	8.96029525020962	-7.95493219614229	22.6775044203346
8.55614973588144	12.965326021947	2.41852575325494	9.86739130684943	-6.93651799637786	18.654652284488
6.32215213252094	24.6548427093408	3.27733191668328	12.3167679640836	-6.09264378472013	21.4547394332294
7.77460934627378	19.2036207792196	3.82505018298123	8.50394509591546	-4.6217357175368	58.4072940573239
7.1264185481599	25.5752392745096	6.13557091333726	10.1055560459824	-5.76632845611847	20.6545261174115
4.96140377181288	21.8471059451396	3.92787914426311	9.87603823353398	-6.09715875380723	35.5115867905377
7.24867275618459	12.0476278655359	4.17118225788356	9.74950903593538	-5.918769342229	28.569327643396
5.96147190481946	21.2041695798324	3.57307767633919	11.6362731085088	-5.97352111699874	21.8882520212038
4.82185297960408	16.8312796970136	4.65906789747577	13.5948028764268	-6.96738774003023	37.1926977977049
3.75860745864988	11.9645059790625	4.45120448323613	12.9862638070772	-4.48528826995725	51.0066953177275
6.3107160024042	9.4642619144585	3.76431174465085	13.3716051420937	-6.28959201062874	28.4102802100314
5.91987458382648	16.1872372377983	3.08869739103621	11.318050687492	-6.46048528237791	22.0754241575973
5.00182845110028	13.9511778841006	2.52596489960614	10.3422216418453	-8.09645839890891	27.6643178652021
6.70841822168244	11.6069014496402	4.53043065514523	11.7479883690877	-6.8367718858314	33.1093942250813
4.15604160013795	17.9723060824196	3.79559015081727	14.5147400127767	-7.22394509935383	28.6459740217909
3.51489876562427	8.74232417452123	4.40836666117905	13.4887689053684	-6.60884902947172	33.325446562244
2.94466950283309	7.02900242073224	4.37376208919152	12.8936602511422	-5.47563908352714	18.8678144725519
4.80997244529895	3.97194650100514	5.55791547983447	13.8841141279359	-7.6772602216	11.9436352845865
5.91637552009527	10.3445901811971	3.15626302252126	11.1848587052984	-5.60859677028019	10.8246353869344
4.50947959119443	13.167564148275	3.60834473137921	13.9203137305166	-6.49847051476419	17.3198223740216
5.20437570601561	10.9381291848019	3.33732669150087	12.0115885416883	-7.76110430732556	27.8558886108475
5.16104581572875	10.561753779516	2.66014281390591	14.007305174165	-6.85046492267573	26.1297021719391
5.74044974260897	11.3181665455762	4.27923205375452	12.9545062451529	-7.58366006563811	28.708104745714
5.6595648062495	15.4617565915969	3.98369511459515	10.8107350189999	-6.29477227589917	21.5498759939628
5.569801903249	14.634007631105	4.28969900241925	12.5842926994539	-9.31589122331263	26.7804146827309
4.95413912486226	13.4096560615405	1.21386467387268	10.969110561623	-8.26786705634024	25.3425635206379
5.59039301652777	11.7138596544154	4.42188649193406	13.6475184380573	-4.89286419504522	20.629610335994
6.11983495182358	12.3328655292175	4.68861157011259	15.7323425806072	-5.32788084076727	25.5597979079788
5.67777141608143	12.5887800270067	3.46855122860908	13.2499134125592	-6.74218677087851	27.3501503316548
3.68083154493709	15.324830745267	4.34532660904673	10.9202563020803	-8.21745579973066	27.9665077786843
5.3050875663216	9.63920530334148	5.84617314472438	11.903557646976	-9.9441342720382	12.7238449351095
6.75910671006402	13.7996213408284	4.78305683043153	14.3080169091198	-8.78698807717981	20.945451023432
5.1699315138042	17.389941875422	1.71882153224285	15.0316302767533	-7.61800484956989	30.9801632268785
5.108655648527	13.8104553015407	3.26262939525775	15.2381796710236	-4.76633871654903	29.8513676844224
4.81147401024005	13.274157863639	2.76285252444003	16.3104604558885	-7.40572253000179	31.0311065228158
5.96041201049903	11.0025051691509	4.46443295477789	14.2474454406694	-8.75036098062501	38.8849575638992
5.10633069692564	15.4727525751147	4.32509760657687	12.9541975670898	-8.29375610281292	30.3040845021716
4.68909899674061	12.1811316968981	4.92881805217387	14.008465592946	-7.15210609227444	16.634294973648
5.640874486317	10.8753313783695	3.91667839179681	14.8769612061399	-7.47977009849837	18.9962927432468
5.16375960708491	12.6785026648113	5.09181957856104	13.126532003975	-7.14133548405911	17.4805030591735
3.9076783027923	13.3050763262478	3.28027916234664	12.3441910154008	-5.93933892290183	27.7224221670037
3.72909095989519	7.89604901184078	2.71193866759672	13.0643622007373	-9.79373229401568	29.3795651534018
4.95028226082355	7.65807983085749	4.86241218219344	14.1668029659183	-8.22682399088241	21.6538920396312
6.16436456827793	11.8551471953926	5.74937453343174	15.4040868048802	-8.7716346877252	17.1722899043707
5.8993770559088	15.6767450163077	4.76881385253318	12.4315758845203	-6.11747205511421	28.8311212391207
5.66456857933714	15.2042386592265	4.26738600610887	12.4747964771869	-6.92017025747312	26.5299868618651
5.38721622934821	14.8506924713473	3.10076473241921	13.9001232562732	-10.8466046318143	22.8831794932223
4.95411045779147	13.9343775621236	3.74397895969098	14.1047466245233	-9.30463417732716	34.4977354913095
4.11608482631862	12.0221119545862	3.48830657349559	16.1143189142729	-7.95704171375437	41.1769774426869
3.7985117278999	7.78353040527739	2.82459518037917	15.2674279043224	-8.51641354911633	32.3052185755944
3.85967537081393	8.75881879235022	4.04289414730645	14.321796489885	-8.92693968554364	20.8215168595101
4.96114094711231	7.63876601432333	3.59631214307161	14.0568784062884	-9.83847456430377	16.1148683998718
4.52913472254003	11.5610429556594	3.37022057551936	14.2383565201075	-10.5307404509426	13.9212059125768
4.54839199882744	9.74048294441782	3.15585811641916	13.5663308714648	-8.73291064462613	20.5774589747069
7.26486597868709	10.2438797171627	1.10496687819735	15.0116895659693	-6.84393915193571	17.8818849784125
6.84202618596961	19.7300356938599	5.20076465204642	13.2383000628099	-8.0607468948605	22.1223047457573
5.84869698842041	20.8110043357283	4.09957809421234	12.2020272256856	-9.51170763014687	35.6444341776473
5.45611438093721	15.8269901454006	2.98690573235384	11.5227549882264	-9.08316853498243	36.7510470225965
5.54384510651199	14.36222232893	4.85534817961859	13.7417638614078	-6.65828755937229	29.5131333640962
5.40342555941102	12.2500458990503	4.51366681029921	15.3037896401722	-7.07372109461153	12.5351531915715
6.00980992404158	13.5211149295599	4.94190622522385	13.4950997068152	-7.83095195108917	28.8058347441223
6.01962750033176	17.6192798862893	5.53222550169998	13.1408679553721	-7.57061274165104	28.5699887323658
8.09567959947428	17.4511150380862	4.5546504704721	13.7365180198099	-7.99083265394508	27.8639851302577
6.56041934307013	26.6761197257559	3.1322180586195	13.092325061048	-8.774772398788	40.0704874597667
6.7272140067838	22.1082525258183	1.57568513735295	15.0935956291918	-9.98550134426241	56.2593336443929
5.81232930172488	19.6989025382159	3.12314221795666	15.5673792451887	-8.60372674862039	55.8361620493539
7.29462025336193	15.4907105070664	4.25552171756169	16.8333243025545	-8.5577544638168	55.7174456459436
4.02650031488651	22.5961770821792	4.48900583953008	15.2341183226931	-8.40577449431286	39.0367082073369
2.93401843655768	10.8115640415374	4.29141147392623	11.4759721047415	-8.61783031100292	37.0297200361744
4.29861075954814	5.63298101488067	4.65332862100071	14.0766714378345	-9.43084115628027	14.299117757569
4.3068388263687	8.7550338209264	4.02885305471904	12.9244181712059	-8.67187870640857	11.7527195607132
5.27523666948934	8.62942201125083	4.15098509271021	15.688360788417	-8.39896361455784	17.896245762319
4.21538908826023	12.4459011981841	4.21447361438023	13.5057886330925	-8.92896123196001	20.3328566857226
5.42647838336191	9.73528567645645	4.24819249077084	14.1947519029714	-8.3062328970614	27.3134933298296
4.84711963579399	12.499486332061	3.74312731215519	14.7316720472573	-9.93617684406107	26.1846663484776
5.70953038394553	11.5099915195997	5.00927633213581	14.1238950783649	-7.73696392488542	25.8112669348942
4.47612214813562	14.9149495364592	3.15074107811241	13.8008708972205	-9.80450556535567	23.8329177953604
6.67554261299139	11.1504842348767	4.39489558518316	12.8410969351444	-9.48783924306674	32.7532658492062
4.50151825508987	17.3883150787397	2.52018641078652	12.5352021358001	-8.56330618007617	26.1201800908006
4.82112450782288	11.5690967314737	1.91624021833376	15.1559746814331	-8.57472334453777	32.2836964998861
5.23910664037989	11.8297408397299	3.48313336589426	15.7983897243764	-8.03942109575979	30.9572779701439
5.09190064782144	10.7730182651151	4.66025361922787	13.9248814574397	-7.2124043996172	21.3297904849513
4.56188800556679	12.2072652478522	2.83748795005408	12.6643756456236	-8.64930985645199	25.2943395768668
6.92595549130259	11.3840266831899	2.02156089981775	9.32858399011334	-9.66604452774085	17.735811068541
5.66540909814224	18.8917126812238	2.88099484169277	10.8962160962011	-10.1253384638608	13.4320185542187
6.31588317069409	14.7935455168688	1.44564039361745	13.4570575922466	-9.84089572824429	29.7652917214011
7.70647012144561	18.9186915153257	4.73983952629409	14.2304655504237	-5.34563547091391	33.5299020082091
8.38279708263838	23.6455742471918	5.49470022268533	12.9272862795543	-4.33861635331884	30.0056553318826
6.47739321987018	26.5771508449521	4.1030986573254	10.3454579240935	-6.24594899498314	25.7457290335074
7.43011576375973	18.1440482831407	3.42300102315384	8.40997106215224	-8.35187018494659	36.7423096157559
5.93898575305636	20.0235393076281	3.16943609927067	11.4280217045588	-8.57862425683506	21.1037352445521
6.02853599992693	15.6602781112104	3.17717287719736	12.7543638125827	-7.15865990572844	44.1114281632163
5.69085006106534	16.0380899631833	2.82914874260288	14.2989924807956	-6.24133505629694	43.1168166951607
5.73755053283431	15.9832107462555	1.32857007089154	12.0648501900696	-6.1580768046642	36.6343310094965
5.96366308428822	16.6389538510476	3.37592345269267	10.6133093762537	-6.26205527503085	29.9966945438662
5.56507269627343	14.2726392041056	5.77435497535906	11.6268979469119	-9.71000944574712	28.491446447674
5.58070461701081	14.0640398305125	5.3927480455559	11.0498893793743	-9.14192168691603	23.837829878972
5.7999819494067	14.330005768595	3.13501159458947	13.4897207784114	-5.9777913121088	21.8923411878773
4.24589004838707	14.9037027332077	2.88273672248874	11.8679851811266	-6.44622079147212	12.7927208400475
4.3221057016408	8.50541327703996	4.27139784451654	11.9518067062071	-7.55865342673034	24.6540654489222
4.87401932906018	9.47224535067006	2.39784002226619	13.8991759477823	-7.60893706883408	25.0834012111564
5.08027196286513	11.3580588953889	4.30972567134516	13.974074264869	-7.16143939902279	26.3372589418922
3.93006968156067	10.2153523479253	4.04947492781372	12.8845408377506	-8.56310689799775	20.7659367629846
5.53599310196359	7.31884064004625	3.73373195135439	12.5257001279383	-8.63831761581363	17.1344558630359
5.93100453403827	11.6644877350305	3.65345168539591	12.7691827011719	-8.69581446022362	17.4537813657178
4.6826194033712	15.864465436668	5.38638644314434	12.7825278880499	-7.58052211196396	16.5213223402252
5.18856199506325	11.9107667869544	2.93148201528168	14.5977814117026	-7.71938335840912	30.9389696563791
5.441606947935	12.4449024912176	2.93703561756166	13.4665902676933	-9.63397764760796	27.4655933414963
5.54682058289645	13.2119362651594	2.57594910722065	15.0426295639919	-6.7606644059075	25.668003406234
6.18976568764091	12.7141056848264	4.560710324518	14.1674183962276	-8.7433161389977	27.0330827280524
6.29718792433784	15.3949870112112	4.62992865576134	13.7755732201352	-8.48502460198687	33.601550524473
6.04152004006827	16.1814344345996	4.88552981209623	13.7452582071927	-9.21165460700772	24.0050935764914
4.61348946672853	16.6089367662619	5.74462594411608	12.7182139954546	-9.92528222308085	24.9783903899028
2.38251831064403	11.8099120140304	2.76420018068699	15.6356185157459	-8.57584665770026	22.8187464098366
5.75516345063011	6.71644267220358	4.20846461097258	15.1747851897882	-8.88124235200305	27.209489748347
5.66979362432607	13.9397605445744	4.51971724957144	14.5016199113488	-7.98516010835648	19.6912267907387
5.50939103215712	13.9464941918529	3.36559036543552	16.3101969093016	-9.48003843617321	32.7401998942538
3.60520147216612	13.9245585070492	4.1131499092094	14.8408653013269	-9.65832458995779	39.2532890992544
3.77141143955598	8.87221583640716	4.3741956829533	15.4168437194826	-8.06223482727287	25.8365567328354
4.73779080746743	7.65490235897843	3.36582610569019	17.0927262163597	-9.87277889436307	21.9080987261234
5.88662422108292	9.36456150759033	5.03925872583601	13.0327947527492	-9.27474475527587	20.4872016015585
4.77451076721652	14.5247484625278	3.8102788716865	15.3574015016536	-7.746314483586	18.1765297177681
4.7891726314854	11.5964716060359	3.78962530269577	16.3124523879234	-9.19512239289413	26.8871759802308
6.1374090835563	10.5458895101354	2.52640671780962	14.6960659704753	-8.5963049951259	26.1296302847012
5.88208142107229	14.9745465466681	1.82989754834028	15.8626810917597	-8.17169859603319	22.4979181759009
4.54587340892823	14.8600689851956	1.37314386001626	15.6333789576578	-11.2114765998135	35.9631704288468
3.61478560903618	9.95445696385355	5.79974765437737	14.6489396367719	-7.90377103941279	32.5294202333675
4.23878904596862	7.51603457337458	5.04917582203749	15.577482558513	-9.597192356161	24.1916230908252
4.05357502118178	9.21718217123037	3.04788739593586	14.536240182338	-9.0555602430787	14.2958786859723
4.58178671484491	8.18005833771672	3.09904893937619	10.7554348780105	-8.45873159138132	9.64414996392974
4.33004639416431	7.57383720425087	4.51732273875507	15.0338862943362	-8.80778146951176	6.76847948763156
4.11678877855757	9.54423715021966	4.99701654465421	15.3188204595038	-8.58998575344335	19.7421034167531
6.40078401335953	9.12620294139341	3.18851809425551	13.7806722856484	-7.2680631813927	23.6428850257119
6.57224251072434	14.4917254110606	4.25893754069708	14.3000769819488	-7.40922960575025	19.0225943914266
6.46777380853525	17.1537160229036	2.96312185782665	13.0616140543445	-9.46566364515839	23.3620726638889
6.14875105106009	16.898837048989	4.56789769217693	12.5582228120926	-10.0931664339875	36.9009347436025
4.71706078818798	14.7002120440715	5.03542925009238	13.2841523340887	-8.89508303186717	41.2321203241616
4.13053224535636	10.9758075887136	3.62387548241869	13.1729219147248	-7.8550465333347	26.3580221285079
6.35931555618983	10.5945154641131	3.4556909369803	11.9075761722064	-6.92190779567598	25.0815954351589
5.19806047117315	16.7102942347641	3.86596382861925	14.0996391295445	-8.43191715776454	17.0508939011058
3.60873879355031	14.5482757070898	2.47538626548475	13.0840962202558	-9.65909229638887	34.8068375534128
5.29941635749786	8.38047466842179	4.97067127396043	13.7769072041617	-5.37937217508104	37.6499910229054
5.47820102643729	10.5644851760941	4.36419982301058	14.7538386386396	-8.10531478396689	21.1727164041972
4.82333087939712	11.8908289565179	3.69160582592732	10.4440260487937	-8.52373750260725	20.6820771853174
5.43427637265445	11.1338569284986	4.13353628623216	12.5139323455167	-7.22896482869199	25.0550265448287
3.94092112238153	12.7859475848385	5.27318877734531	15.1446127034415	-8.66903437631994	16.4978038483982
4.53749676658829	8.47086263078036	3.01760510740089	13.3146190313301	-8.68435254582164	28.6364283305751
3.43455767861351	8.98192601152319	2.55844181650136	13.9852739721993	-8.04988584821288	22.9235715756592
4.8187907714113	7.93520584960146	1.87170367452802	13.6634311496826	-6.47201872966372	18.7826334902649
5.12438827092977	10.194403453331	2.73121637313109	12.121218510525	-6.65248853710395	19.4930503388313
5.24895544687749	13.2330149187795	2.67361691336308	12.0975317357749	-8.29909122370937	26.8417475248663
4.30864632784728	12.558463716611	3.78406120098848	10.2020596166403	-8.72719450397206	23.0157005283087
4.68883419782796	11.6472057771661	5.16524123263722	11.1262124573473	-7.50175971791145	19.1809582964931
5.6153361456915	9.66053807889839	4.67019250412999	12.726180347333	-5.53825181735628	13.8637427435287
6.23823393931001	12.0200648982132	2.84998864168722	12.7404474281167	-4.39103901013228	15.0544540431112
5.86569743660573	15.7055562897	3.2891863264979	10.1744156563957	-5.82198529599376	18.2948962312888
5.79870200446566	16.4668242197182	5.32330515569722	13.2304084908828	-6.53906950155115	27.765257947294
5.55884447954218	14.4013109261705	4.26771266481896	11.7702814555524	-7.49269026013286	42.5710233782453
3.51349998732368	11.6424008665456	3.93281890655678	11.7960618209061	-7.97614043938743	36.4165937405997
4.62546504229694	7.80790364243122	4.88355459100913	12.5426733110783	-8.36894627649361	20.0972119916351
5.81601241697931	7.73024957565867	4.31191022612709	12.197023950576	-8.30560861718837	14.3006352124884
4.12733057109486	12.6437355764792	3.85129879914375	14.0339425387746	-7.31127189969114	20.3303395144052
5.68506998619157	8.48024140370322	3.64906006906148	14.1972629843756	-7.37987677213152	26.4913097997322
5.33510303048748	14.3974633902938	5.7077293458042	13.4490148312563	-6.66324066822157	20.3628219024106
6.46886605883028	11.9376103042667	4.17471228760984	12.6367557405052	-8.36365526049959	33.7736205565622
5.02183961196789	16.1660405468736	4.14512768022927	11.9204420332185	-8.74002229475496	29.565374137309
4.91427003664195	12.7832145975903	4.12631228632351	11.6365806008423	-7.11690326797839	30.5218461224857
6.27302979244488	11.1150872061809	4.04907217663323	15.402466773021	-8.36344224797746	28.5065745271686
6.38126482155193	16.0364719721276	4.48350729797874	13.1800521028669	-7.99551319925823	32.4078383673689
6.96381222100601	17.3597624592379	5.29328275643727	12.7314590335922	-7.66674723040886	34.268766843865
6.6354649050727	20.2367970262316	4.48618762322719	14.8502352375707	-6.72799611215626	34.8468824694332
5.86704255552897	18.0115326762518	4.72974609825802	13.6305249980284	-6.69650081903054	42.8399264555133
6.0506298901274	16.4934397053067	3.24608025902771	15.0863333155582	-5.79779829287119	40.0670397911585
5.43265163264338	17.7470510811497	2.5187556980586	12.5142530486231	-7.54970031173978	38.0272880059891
4.73000942918471	13.0757668062932	3.71374710984499	10.2085552439791	-7.42276205966854	46.7316294674522
5.37065376151574	9.65537206136564	3.35207966605364	14.3131182033916	-8.57373162280222	33.596540016491
5.71854586697379	13.0640894177646	4.45739980629755	12.7539685960355	-5.43369979000114	27.1082408474241
6.92404582416279	13.4491899565612	4.4914548063363	12.9585686345722	-4.29987208126303	23.9109663569722
8.12164336561992	17.6922382049782	4.43444018438489	11.3088632431802	-7.23841226420533	19.4681425389356
5.48254935529301	23.2476738454968	5.05004332931012	11.1764486215791	-8.38311060949235	31.6133897209988
5.29318316002383	15.8755786175173	2.09862453416681	12.7895267554494	-8.628989156685	37.9723682633966
5.29975688624598	13.73771550192	2.84843528683665	15.4983288072033	-7.36545351256733	37.901570770478
5.33600728860952	12.4724644494625	3.93584469940656	16.9727202031005	-5.26044727573278	32.2048041335867
6.69448980169183	13.4836690625193	5.17106915112632	13.472833737663	-5.85334575642019	29.1386792310825
6.27900776941673	14.9954252386753	3.91330278658105	10.3637054864967	-7.16603204637483	34.6284576825297
5.50178104927897	17.5338450008735	3.34770934025405	9.39536256514388	-8.00545779976606	20.9674350435828
5.0314802395534	14.0198539152401	3.34996426189432	12.7800943294078	-7.461221363412	24.8159089873604
6.24437518432614	11.0621129399567	4.84736530211636	14.13339515586	-6.09026416419729	28.5243128329105
6.57982181472417	15.3478858029224	5.84065664402019	12.160609879918	-5.67288685274918	30.4942062619637
5.94155128657631	18.1356556434537	4.55221285350872	10.1615935993242	-6.50584283332663	29.9524115317183
3.97624807509738	16.7756422540142	3.34395916767884	9.85262042236665	-9.11611646056652	31.6564863841783
5.98088663405698	9.77301816017872	3.42419520564867	10.9766253621083	-7.38355481444276	31.551257008649
7.29647256809353	13.2568489476606	4.77331673529152	16.2721261401258	-7.4988061742384	26.3949140632314
7.1249682846904	21.167772463059	2.73766923338707	14.0471400840954	-5.99814555506344	38.8964255673109
